# Supplementary material for: Symmetry-based approach to oligostilbenoids: Rapid entry to viniferifuran, shoreaphenol, malibatol A, and diptoindonesin G
Source: publisher site journal article supplement (doi:10.3762/bjoc.12.266), 2016-12-12

## Supporting Information

for

### Symmetry-based approach to oligostilbenoids: Rapid entry to viniferifuran, shoreaphenol, malibatol A, and diptoindonesin G

Youngeun Jung<sup>‡</sup>, Dileep Kumar Singh<sup>‡</sup> and Ikyon Kim<sup>\*§</sup>

Address: College of Pharmacy and Yonsei Institute of Pharmaceutical Sciences, Yonsei University, 85 Songdogwahak-ro, Yeonsu-gu, Incheon 21983, Republic of Korea

\*Corresponding author

Email: Ikyon Kim - [ikyonkim@yonsei.ac.kr](mailto:ikyonkim@yonsei.ac.kr)

§Tel.: +82 32 749 4515; fax: +82 32 749 4105

‡Equal contributors

### Experimental procedures, compound characterization data, and <sup>1</sup>H and <sup>13</sup>C NMR spectra of synthesized compounds

#### Table of Contents

|                                                                      |        |
|----------------------------------------------------------------------|--------|
| Experimental procedures and compound characterization data           | S3–S14 |
| Copies of <sup>1</sup> H and <sup>13</sup> C NMR spectra of <b>1</b> | S15    |
| Copies of <sup>1</sup> H and <sup>13</sup> C NMR spectra of <b>2</b> | S16    |
| Copies of <sup>1</sup> H and <sup>13</sup> C NMR spectra of <b>3</b> | S17    |
| Copies of <sup>1</sup> H and <sup>13</sup> C NMR spectra of <b>4</b> | S18    |
| Copies of <sup>1</sup> H and <sup>13</sup> C NMR spectra of <b>5</b> | S19    |

|                                                                     |            |
|---------------------------------------------------------------------|------------|
| Copies of $^1\text{H}$ and $^{13}\text{C}$ NMR spectra of <b>6</b>  | <b>S20</b> |
| Copies of $^1\text{H}$ and $^{13}\text{C}$ NMR spectra of <b>7</b>  | <b>S21</b> |
| Copies of $^1\text{H}$ and $^{13}\text{C}$ NMR spectra of <b>8</b>  | <b>S22</b> |
| Copies of $^1\text{H}$ and $^{13}\text{C}$ NMR spectra of <b>9</b>  | <b>S23</b> |
| Copies of $^1\text{H}$ and $^{13}\text{C}$ NMR spectra of <b>11</b> | <b>S24</b> |
| Copies of $^1\text{H}$ and $^{13}\text{C}$ NMR spectra of <b>12</b> | <b>S25</b> |
| Copies of $^1\text{H}$ and $^{13}\text{C}$ NMR spectra of <b>13</b> | <b>S26</b> |
| Copies of $^1\text{H}$ and $^{13}\text{C}$ NMR spectra of <b>14</b> | <b>S27</b> |
| Copies of $^1\text{H}$ and $^{13}\text{C}$ NMR spectra of <b>15</b> | <b>S28</b> |
| Copies of $^1\text{H}$ and $^{13}\text{C}$ NMR spectra of <b>16</b> | <b>S29</b> |
| Copies of $^1\text{H}$ and $^{13}\text{C}$ NMR spectra of <b>17</b> | <b>S30</b> |
| Copies of $^1\text{H}$ and $^{13}\text{C}$ NMR spectra of <b>18</b> | <b>S31</b> |

## General methods

Unless specified, all reagents and starting materials were purchased from commercial sources and used as received without purification. “Concentrated” refers to the removal of volatile solvents via distillation using a rotary evaporator. “Dried” refers to pouring onto, or passing through, anhydrous magnesium sulfate followed by filtration. Flash chromatography was performed using silica gel (230–400 mesh) with hexanes, ethyl acetate, and dichloromethane as eluent. All reactions were monitored by thin-layer chromatography on 0.25 mm silica plates (F-254) visualizing with UV light. Melting points were measured using a capillary melting point apparatus.  $^1\text{H}$  and  $^{13}\text{C}$  NMR spectra were recorded on 400 MHz NMR spectrometer and were described as chemical shifts, multiplicity (s, singlet; d, doublet; t, triplet; q, quartet; m, multiplet), coupling constant in hertz (Hz), and number of protons. HRMS were measured with electrospray ionization (ESI) and Q-TOF mass analyzer.

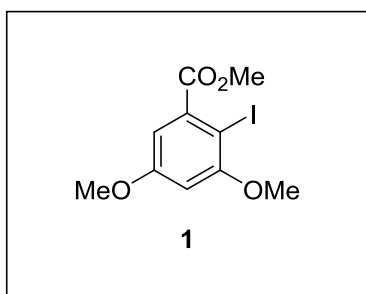

**Methyl 2-iodo-3,5-dimethoxybenzoate (1).** To a stirred solution of methyl 3,5-dimethoxybenzoate (1.0 g, 5.1 mmol) in  $\text{CHCl}_3$  (25 mL) were added silver trifluoroacetate (1.13 g, 1.0 equiv) and  $\text{I}_2$  (1.29 g, 1.0 equiv). After being stirred at rt for 5 h, the reaction mixture was concentrated under reduced pressure to give the crude residue, which was purified by silica gel column chromatography (hexanes/ethyl acetate = 17:3) to give **1**. White solid, mp: 79.9-80.2 °C (771 mg, 49%);  $^1\text{H NMR}$  (400 MHz,  $\text{CDCl}_3$ )  $\delta$  6.80 (s, 1H), 6.52 (s, 1H), 3.94 (s, 3H), 3.88 (s, 3H), 3.83 (s, 3H);  $^{13}\text{C NMR}$  (100 MHz,  $\text{CDCl}_3$ )  $\delta$  168.1, 161.0,

159.5, 139.0, 106.6, 101.4, 75.8, 56.8, 55.8, 52.7; **HRMS** (ESI-QTOF)  $m/z$   $[M+H]^+$  calcd for  $C_{10}H_{12}IO_4$  322.9775 found 322.9774.

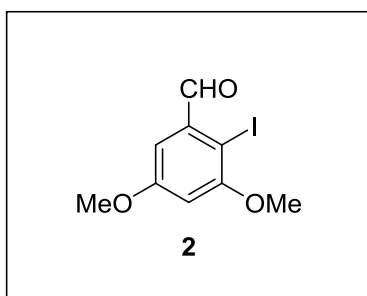

**2-Iodo-3,5-dimethoxybenzaldehyde (2).** To a stirred solution of 3,5-dimethoxybenzaldehyde (500 mg, 3.0 mmol) in  $CH_2Cl_2$  (10 mL) were added silver trifluoroacetate (665 mg, 1.0 equiv) and  $I_2$  (764 mg, 1.0 equiv) in  $CH_2Cl_2$  (2 mL). After being stirred at rt for 5 h, the reaction mixture was concentrated under reduced pressure to give the crude residue, which was purified by silica gel column chromatography (hexanes/ethyl acetate = 9:1) to give **2**. White solid, mp: 95.9-96.8 °C (755 mg, 85%);  **$^1H$  NMR** (400 MHz,  $CDCl_3$ )  $\delta$  10.18 (s, 1H), 7.07 (s, 1H), 6.67 (s, 1H), 3.91 (s, 3H), 3.86 (s, 3H);  **$^{13}C$  NMR** (100 MHz,  $CDCl_3$ )  $\delta$  196.4, 161.4, 159.1, 136.7, 105.1, 104.8, 84.3, 56.9, 56.0; **HRMS** (ESI-QTOF)  $m/z$   $[M+H]^+$  calcd for  $C_9H_{10}IO_3$  292.9669 found 292.9667.

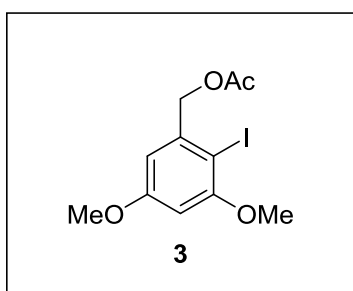

**2-Iodo-3,5-dimethoxybenzyl acetate (3).** The compound **7** (4.5 g, 15.3 mmol) was dissolved in pyridine (7 mL) and  $Ac_2O$  (7 mL) at rt. After being stirred for 16 h, the reaction mixture was diluted with ethyl acetate (30 mL) and washed with 1M HCl (20 mL  $\times$  3). The combined organic layers were dried over  $MgSO_4$  and concentrated in vacuo. The residue was purified by silica gel column chromatography (hexanes/ethyl acetate = 10:1) to give **3**. White solid,

mp: 75.8-76.2 °C (4.9 g, 96%);  $^1\text{H NMR}$  (400 MHz,  $\text{CDCl}_3$ )  $\delta$  6.62 (s, 1H), 6.41 (s, 1H), 5.14 (s, 2H), 3.87 (s, 3H), 3.83 (s, 3H), 2.15 (s, 3H);  $^{13}\text{C NMR}$  (100 MHz,  $\text{CDCl}_3$ )  $\delta$  170.7, 161.3, 159.1, 140.3, 106.6, 98.4, 79.3, 77.5, 77.2, 70.5, 56.7, 55.7, 21.1; **HRMS** (ESI-QTOF)  $m/z$   $[\text{M}+\text{H}]^+$  calcd for  $\text{C}_{11}\text{H}_{14}\text{O}_4$  336.9931 found 336.9930.

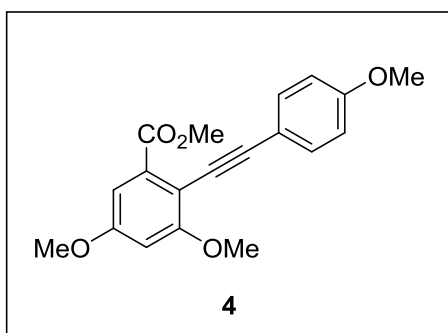

**Methyl 3,5-dimethoxy-2-((4-methoxyphenyl)ethynyl)benzoate (4).** To a stirred solution of **1** (150 mg, 0.47 mmol) in  $\text{Et}_3\text{N}$  (2 mL) were added  $(\text{Ph}_3\text{P})_2\text{PdCl}_2$  (16 mg, 0.05 equiv),  $\text{CuI}$  (4 mg, 0.05 equiv), and 4-ethynylanisole (68 mg, 1.1 equiv). After being heated at 60 °C for 5 h, the reaction mixture was concentrated under reduced pressure to give the crude residue, which was purified by silica gel column chromatography (hexanes/ethyl acetate = 17:3) to give **4**. Pale brown solid, mp: 98.4-99.2 °C (151 mg, 99%);  $^1\text{H NMR}$  (400 MHz,  $\text{CDCl}_3$ )  $\delta$  7.50 (d,  $J = 8.8$  Hz, 2H), 7.03 (d,  $J = 1.6$  Hz, 1H), 6.87 (d,  $J = 8.4$  Hz, 2H), 6.61 (s, 1H), 3.95 (s, 3H), 3.91 (s, 3H), 3.86 (s, 3H), 3.83 (s, 3H);  $^{13}\text{C NMR}$  (100 MHz,  $\text{CDCl}_3$ )  $\delta$  167.2, 161.8, 159.9, 159.6, 134.7, 133.2, 116.3, 114.0, 106.4, 106.0, 102.2, 97.5, 82.6, 56.5, 55.8, 55.4, 52.4; **HRMS** (ESI-QTOF)  $m/z$   $[\text{M}+\text{H}]^+$  calcd for  $\text{C}_{19}\text{H}_{19}\text{O}_5$  327.1227 found 327.1225.

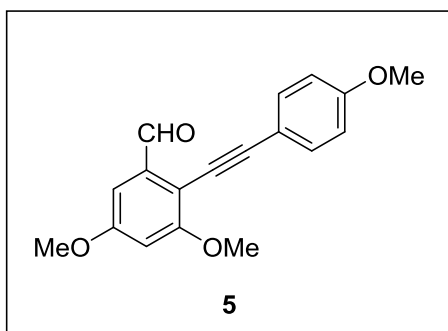

**3,5-Dimethoxy-2-((4-methoxyphenyl)ethynyl)benzaldehyde (5).** To a stirred solution of **2**

(500 mg, 1.71 mmol) in Et<sub>3</sub>N (8 mL) were added (Ph<sub>3</sub>P)<sub>2</sub>PdCl<sub>2</sub> (60 mg, 0.05 equiv), CuI (16 mg, 0.05 equiv), and 4-ethynylanisole (249 mg, 1.1 equiv). After being heated at 60 °C for 5 h, the reaction mixture was concentrated under reduced pressure to give the crude residue, which was purified by silica gel column chromatography (hexanes/ethyl acetate = 17:3) to give **5**. Yellow solid, mp: 90.1-90.9 °C (488 mg, 96%); <sup>1</sup>H NMR (400 MHz, CDCl<sub>3</sub>) δ 10.62 (s, 1H), 7.50 (d, *J* = 8.8 Hz, 2H), 7.03 (d, *J* = 1.6 Hz, 1H), 6.88 (d, *J* = 8.4 Hz, 2H), 6.67 (d, *J* = 1.6 Hz, 1H), 3.92 (s, 3H), 3.87 (s, 3H), 3.83 (s, 3H); <sup>13</sup>C NMR (100 MHz, CDCl<sub>3</sub>) δ 192.0, 161.6, 160.5, 160.0, 137.8, 133.1, 115.2, 114.2, 110.7, 104.6, 101.1, 99.4, 79.8, 56.4, 55.8, 55.4; HRMS (ESI-QTOF) *m/z* [M+H]<sup>+</sup> calcd for C<sub>18</sub>H<sub>17</sub>O<sub>4</sub> 297.1121 found 297.1122.

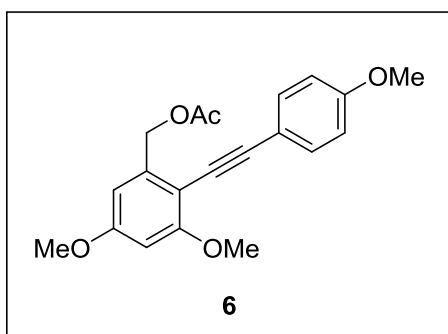

**3,5-Dimethoxy-2-((4-methoxyphenyl)ethynyl)benzyl acetate (6).** To a stirred solution of **3** (500 mg, 1.48 mmol) in Et<sub>3</sub>N (7 mL) were added (Ph<sub>3</sub>P)<sub>2</sub>PdCl<sub>2</sub> (52 mg, 0.05 equiv), CuI (14 mg, 0.05 equiv), and 4-ethynylanisole (216 mg, 1.1 equiv). After being heated at 60 °C for 5 h, the reaction mixture was concentrated under reduced pressure to give the crude residue, which was purified by silica gel column chromatography (hexanes/ethyl acetate = 9:1) to give **6**. Pale yellow solid, mp: 92.0-92.6 °C (405 mg, 80%); <sup>1</sup>H NMR (400 MHz, CDCl<sub>3</sub>) δ 7.47 (d, *J* = 8.8 Hz, 2H), 6.86 (d, *J* = 8.8 Hz, 2H), 6.57 (s, 1H), 6.44 (s, 1H), 5.31 (s, 2H), 3.89 (s, 3H), 3.84 (s, 3H), 3.82 (s, 3H), 2.12 (s, 3H); <sup>13</sup>C NMR (100 MHz, CDCl<sub>3</sub>) δ 170.9, 161.4, 160.6, 159.6, 140.2, 133.0, 116.0, 114.0, 105.2, 104.9 98.0, 97.4, 81.5, 65.1, 56.2, 55.6, 55.4, 21.1; HRMS (ESI-QTOF) *m/z* [M+H]<sup>+</sup> calcd for C<sub>20</sub>H<sub>21</sub>O<sub>5</sub> 341.1384 found 341.1386.

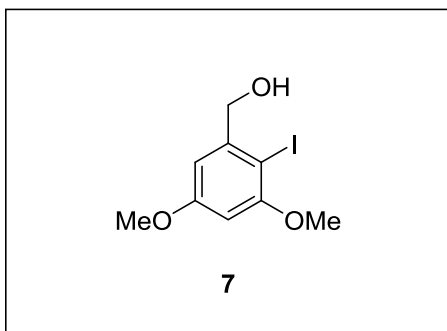

**(2-Iodo-3,5-dimethoxyphenyl)methanol (7).** To a stirred solution of 3,5-dimethoxybenzyl alcohol (2.6 g, 15.5 mmol) in DMF (30 mL) was portionwise added NIS (3.5 g, 1.0 equiv) at 0 °C. After being heated at 40 °C for 3 h, the reaction mixture was diluted with the ethyl acetate (20 mL) and washed with 10% aqueous Na<sub>2</sub>SO<sub>3</sub> solution and brine. The combined organic layers were dried over MgSO<sub>4</sub> and concentrated in vacuo. The residue was used for the next step without further purification. White solid, mp: 93.8-94.2 °C (4.5 g, 99%); <sup>1</sup>H NMR (400 MHz, CDCl<sub>3</sub>) δ 6.74 (s, 1H), 6.39 (s, 1H), 4.68 (d, *J* = 5.6 Hz, 2H), 3.87 (s, 3H), 3.83 (s, 3H), 2.14 (t, *J* = 6.0 Hz, 1H); <sup>13</sup>C NMR (100 MHz, CDCl<sub>3</sub>) δ 161.5, 158.8, 144.9, 105.4, 98.2, 78.0, 69.8, 56.6, 55.7; HRMS (ESI-QTOF) *m/z* [M+H]<sup>+</sup> calcd for C<sub>9</sub>H<sub>12</sub>IO<sub>3</sub> 294.9826 found 294.9826.

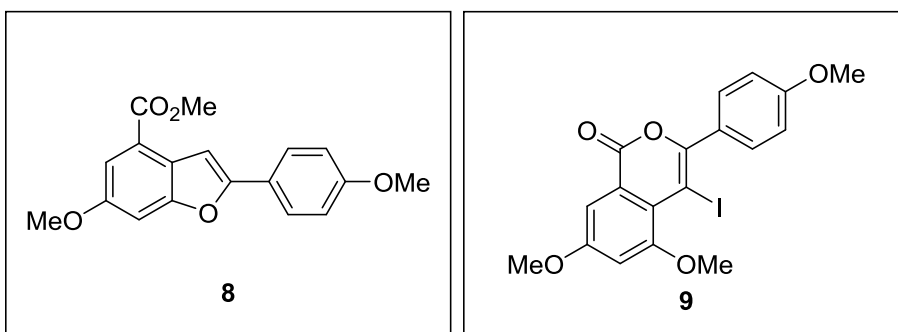

**Methyl 6-methoxy-2-(4-methoxyphenyl)benzofuran-4-carboxylate (8) and 4-iodo-5,7-dimethoxy-3-(4-methoxyphenyl)-1H-isochromen-1-one (9).** To a stirred solution of compound **4** (33 mg, 0.1 mmol) in CH<sub>2</sub>Cl<sub>2</sub> (2 mL) were added I<sub>2</sub> (77 mg, 3.0 equiv) and NaHCO<sub>3</sub> (26 mg, 3.0 equiv) at 0 °C. After being stirred at rt for 1 h, the reaction mixture was diluted with CH<sub>2</sub>Cl<sub>2</sub> (5 mL) and washed with saturated aqueous Na<sub>2</sub>SO<sub>3</sub> (5 mL × 3). The

combined organic layers were dried over  $\text{MgSO}_4$  and concentrated in vacuo. The residue was purified by silica gel column chromatography (hexanes/ethyl acetate/dichloromethane = 20:1:2) to give **8** and **9**. **8**: White solid, mp: 105.4-106.1 °C (10 mg, 32%);  $^1\text{H NMR}$  (400 MHz,  $\text{CDCl}_3$ )  $\delta$  7.81(d,  $J = 8.4$  Hz, 2H), 7.57 (s, 1H), 7.39 (s, 1H), 7.26 (s, 1H), 6.98 (d,  $J = 8.8$  Hz, 2H), 4.00 (s, 3H), 3.91 (s, 3H), 3.87 (s, 3H);  $^{13}\text{C NMR}$  (100 MHz,  $\text{CDCl}_3$ )  $\delta$  167.0, 160.2, 157.2, 156.9, 156.2, 126.5, 124.2, 123.2, 121.9, 114.5, 112.6, 101.7, 100.7, 56.2, 55.5, 52.2; **HRMS** (ESI-QTOF)  $m/z$   $[\text{M}+\text{H}]^+$  calcd for  $\text{C}_{18}\text{H}_{17}\text{O}_5$  313.1071 found 313.1072.

**9**: Pale yellow solid, mp: decomposed at 157 °C (29 mg, 66%);  $^1\text{H NMR}$  (400 MHz,  $\text{CDCl}_3$ )  $\delta$  7.59 (d,  $J = 8.4$  Hz, 2H), 7.42 (d,  $J = 1.6$  Hz, 1H), 6.96 (d,  $J = 8.4$  Hz, 2H), 6.86 (d,  $J = 1.6$  Hz, 1H), 3.93 (s, 3H), 3.91 (s, 3H), 3.87 (s, 3H);  $^{13}\text{C NMR}$  (100 MHz,  $\text{CDCl}_3$ )  $\delta$  162.1, 160.7, 160.4, 156.2, 153.1, 132.1, 129.0, 123.5, 121.1, 113.5, 107.1, 102.5, 61.9, 56.0, 55.6, 55.5; **HRMS** (ESI-QTOF)  $m/z$   $[\text{M}+\text{H}]^+$  calcd for  $\text{C}_{18}\text{H}_{16}\text{IO}_5$  439.0037 found 439.0038.

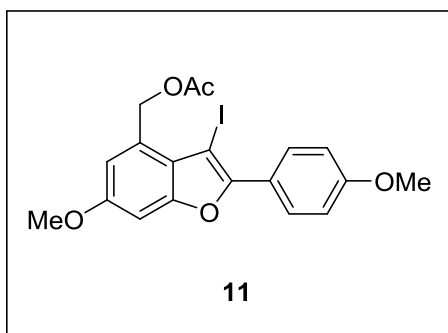

**(3-Iodo-6-methoxy-2-(4-methoxyphenyl)benzofuran-4-yl)methyl acetate (11)**. To a stirred solution of **6** (1.0 g, 2.94 mmol) in  $\text{CH}_2\text{Cl}_2$  (10 mL) were added  $\text{I}_2$  (2.2 g, 3.0 equiv) and  $\text{NaHCO}_3$  (740 mg, 3.0 equiv) at 0 °C. After being stirred at rt for 18 h, the reaction mixture was washed with saturated aqueous  $\text{Na}_2\text{SO}_3$  (10 mL  $\times$  3). The combined organic layer was dried over  $\text{MgSO}_4$  and concentrated in vacuo. The residue was purified by silica gel column chromatography (hexanes/ethyl acetate/dichloromethane = 50:1:2) to give **11**. White solid, mp: 132.8-133.5 °C (1.12 g, 84%);  $^1\text{H NMR}$  (400 MHz,  $\text{CDCl}_3$ )  $\delta$  7.98 (d,  $J = 8.4$  Hz, 2H), 7.03 (s, 1H), 7.00 (d,  $J = 8.8$  Hz, 2H), 6.91 (s, 1H), 5.59 (s, 2H), 3.872 (s, 3H), 3.865 (s, 3H),



2.16 (s, 3H);  $^{13}\text{C}$  NMR (100 MHz,  $\text{CDCl}_3$ )  $\delta$  170.9, 160.3, 157.8, 155.7, 153.9, 129.7, 129.2, 122.8, 122.0, 114.2, 114.0, 96.1, 62.4, 55.9, 55.7, 55.5, 21.5; HRMS (ESI-QTOF)  $m/z$   $[\text{M}+\text{H}]^+$  calcd for  $\text{C}_{19}\text{H}_{18}\text{IO}_5$  453.0193 found 453.0192.

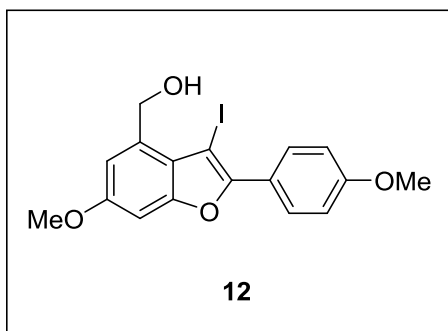

**(3-Iodo-6-methoxy-2-(4-methoxyphenyl)benzofuran-4-yl)methanol (12).** To a stirred solution of compound **11** (1.0 g, 2.2 mmol) in MeOH (7 mL) was added  $\text{K}_2\text{CO}_3$  (917 mg, 3.0 equiv). After being stirred at rt for 2 h, the reaction mixture was concentrated under reduced pressure and extracted with  $\text{CH}_2\text{Cl}_2$  (10 mL). The aqueous layer was extracted with  $\text{CH}_2\text{Cl}_2$  (5 mL  $\times$  2) two more times. The combined organic layers were dried over  $\text{MgSO}_4$  and concentrated in vacuo. The residue was used for the next step without further purification. Pale yellow solid, mp: 141.8-142.4 °C (906 mg, 100%);  $^1\text{H}$  NMR (400 MHz,  $\text{CDCl}_3$ )  $\delta$  7.97 (d,  $J = 8.8$  Hz, 2H), 7.05-6.93 (m, 4H), 5.21 (s, 2H), 3.873 (s, 3H), 3.865 (s, 3H);  $^{13}\text{C}$  NMR (100 MHz,  $\text{CDCl}_3$ )  $\delta$  160.3, 158.1, 155.8, 153.6, 134.6, 129.6, 122.8, 121.3, 114.0, 112.6, 95.5, 61.0, 55.9, 55.5; HRMS (ESI-QTOF)  $m/z$   $[\text{M}+\text{H}]^+$  calcd for  $\text{C}_{17}\text{H}_{16}\text{IO}_4$  411.0088 found 411.0086.

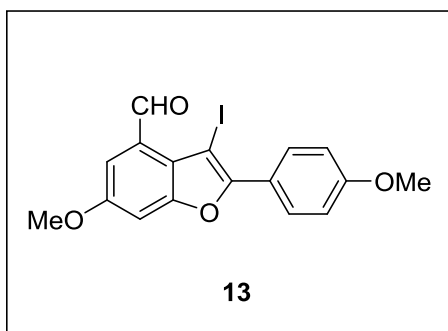

**3-Iodo-6-methoxy-2-(4-methoxyphenyl)benzofuran-4-carbaldehyde (13).** To a stirred

solution of **12** (906 mg, 2.2 mmol) in dry CH<sub>2</sub>Cl<sub>2</sub> (10 mL) was added Dess–Martin periodinane (1124 mg, 1.2 equiv) at 0 °C. After being stirred at rt for 2 h, the reaction mixture was suction-filtered through a pad of Celite and the filtrate was concentrated under reduced pressure to give the residue which was purified by silica gel column chromatography (hexanes/ethyl acetate/dichloromethane = 20:1:2) to give compound **13**. Yellow solid, mp: 159.2-159.9 °C (900 mg, 100%); <sup>1</sup>H NMR (400 MHz, CDCl<sub>3</sub>) δ 11.59 (s, 1H), 8.01 (d, *J* = 8.8 Hz, 2H), 7.54 (d, *J* = 1.2 Hz, 1H), 7.26 (s, 1H), 7.03 (d, *J* = 8.8 Hz, 2H), 3.91 (s, 3H), 3.89 (s, 3H); <sup>13</sup>C NMR (100 MHz, CDCl<sub>3</sub>) δ 187.7, 160.8, 157.5, 156.6, 156.3, 130.2, 129.4, 126.1, 122.1, 114.1, 109.2, 103.0, 56.2, 55.6, 53.1; HRMS (ESI-QTOF) *m/z* [M+H]<sup>+</sup> calcd for C<sub>17</sub>H<sub>14</sub>IO<sub>4</sub> 408.9931 found 408.9930.

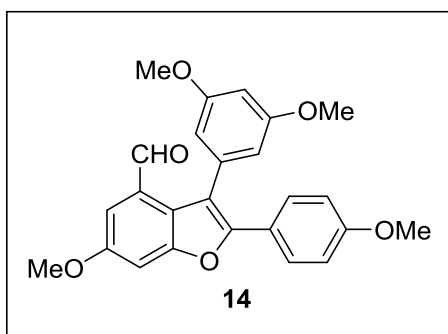

### 3-(3,5-Dimethoxyphenyl)-6-methoxy-2-(4-methoxyphenyl)benzofuran-4-carbaldehyde

(**14**). Similar as already described in [S1] a mixture of **13** (850 mg, 2.08 mmol), Pd(Ph<sub>3</sub>P)<sub>4</sub> (241 mg, 0.1 equiv), K<sub>2</sub>CO<sub>3</sub> (576 mg, 2.0 equiv), and 3,5-dimethoxyphenylboronic acid (758 mg, 2.0 equiv) in toluene/EtOH/H<sub>2</sub>O (4:2:1, 14 mL) was heated at 100 °C for 3 h. The reaction mixture was concentrated under reduced pressure, diluted with CH<sub>2</sub>Cl<sub>2</sub> (15 mL), and washed with H<sub>2</sub>O (15 mL). The aqueous layer was extracted with CH<sub>2</sub>Cl<sub>2</sub> (15 mL × 2) two more times. The combined organic layers were dried over MgSO<sub>4</sub> and concentrated in vacuo. The residue was purified by silica gel column chromatography (hexanes/ethyl acetate/dichloromethane = 50:1:2) to give **14**. Yellow solid, mp: 162.1-162.7 °C (767 mg, 88%); <sup>1</sup>H NMR (400 MHz, CDCl<sub>3</sub>) δ 9.78 (s, 1H), 7.53 (d, *J* = 8.8 Hz, 2H), 7.46 (d, *J* = 2.0

Hz, 1H), 7.32 (d,  $J = 2.0$  Hz, 1H), 6.83 (d,  $J = 8.8$  Hz, 2H), 6.61 (d,  $J = 1.6$  Hz, 2H), 6.56 (s, 1H), 3.92 (s, 3H), 3.80 (s, 3H), 3.79 (s, 6H);  $^{13}\text{C}$  NMR (100 MHz,  $\text{CDCl}_3$ )  $\delta$  189.7, 161.9, 159.8, 157.4, 155.2, 152.2, 136.3, 129.3, 127.9, 126.7, 122.6, 114.9, 114.0, 107.8, 107.4, 103.1, 100.6, 56.1, 55.4, 55.3; HRMS (ESI-QTOF)  $m/z$   $[\text{M}+\text{H}]^+$  calcd for  $\text{C}_{25}\text{H}_{23}\text{O}_6$  419.1489 found 419.1488.

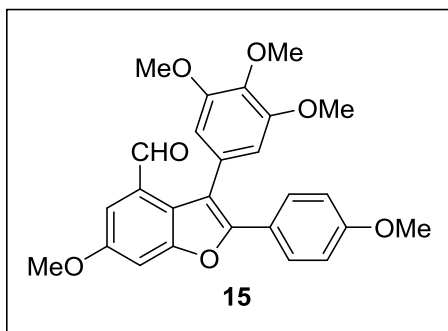

**6-Methoxy-2-(4-methoxyphenyl)-3-(3,4,5-trimethoxyphenyl)benzofuran-4-carbaldehyde (15).** Similar as already described in [S1] a mixture of **13** (60 mg, 0.15 mmol),  $\text{Pd}(\text{Ph}_3\text{P})_4$  (17 mg, 0.1 equiv),  $\text{K}_2\text{CO}_3$  (41 mg, 2.0 equiv), and 3,4,5-trimethoxyphenylboronic acid (62 mg, 2.0 equiv) in toluene/EtOH/ $\text{H}_2\text{O}$  (4:2:1, 1.75 mL) was heated at 100 °C for 3 h. The reaction mixture was concentrated under reduced pressure, diluted with  $\text{CH}_2\text{Cl}_2$  (5 mL), and washed with  $\text{H}_2\text{O}$  (5 mL). The aqueous layer was extracted with  $\text{CH}_2\text{Cl}_2$  (5 mL  $\times$  2) two more times. The combined organic layers were dried over  $\text{MgSO}_4$  and concentrated in vacuo. The residue was purified by silica gel column chromatography (hexanes/ethyl acetate/dichloromethane = 20:1:2) to give **15**. Yellow solid, mp: 171.4-172.2 °C (59 mg, 89%);  $^1\text{H}$  NMR (400 MHz,  $\text{CDCl}_3$ )  $\delta$  9.81 (s, 1H), 7.50 (d,  $J = 8.4$  Hz, 2H), 7.47 (s, 1H), 7.34 (s, 1H), 6.84 (d,  $J = 8.8$  Hz, 2H), 6.68 (s, 2H), 3.97 (s, 3H), 3.92 (s, 3H), 3.81 (s, 9H);  $^{13}\text{C}$  NMR (100 MHz,  $\text{CDCl}_3$ )  $\delta$  189.8, 160.0, 157.6, 155.4, 154.5, 152.5, 138.2, 129.9, 129.5, 128.0, 126.9, 122.6, 115.0, 114.2, 107.6, 106.8, 103.3, 61.3, 56.4, 56.3, 55.4; HRMS (ESI-QTOF)  $m/z$   $[\text{M}+\text{H}]^+$  calcd for  $\text{C}_{26}\text{H}_{25}\text{O}_7$  449.1595 found 449.1596.

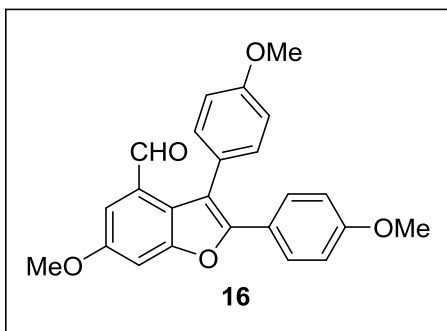

**6-Methoxy-2,3-bis(4-methoxyphenyl)benzofuran-4-carbaldehyde (16).** Similar as already described in [S1] a mixture of **13** (60 mg, 0.15 mmol), Pd(Ph<sub>3</sub>P)<sub>4</sub> (17 mg, 0.1 equiv), K<sub>2</sub>CO<sub>3</sub> (41 mg, 2.0 equiv), and 4-methoxyphenylboronic acid (45 mg, 2.0 equiv) in toluene/EtOH/H<sub>2</sub>O (4:2:1, 1.75 mL) was heated at 100 °C for 3 h. The reaction mixture was concentrated under reduced pressure, diluted with CH<sub>2</sub>Cl<sub>2</sub> (5 mL), and washed with H<sub>2</sub>O (5 mL). The aqueous layer was extracted with CH<sub>2</sub>Cl<sub>2</sub> (5 mL × 2) two more times. The combined organic layers were dried over MgSO<sub>4</sub> and concentrated in vacuo. The residue was purified by silica gel column chromatography (hexanes/ethyl acetate/dichloromethane = 20:1:2) to give **16**. Orange solid, mp: 148.5-149.3 °C (53 mg, 92%); <sup>1</sup>H NMR (400 MHz, CDCl<sub>3</sub>) δ 9.77 (s, 1H), 7.50-7.41 (m, 3H), 7.35 (d, *J* = 8.4 Hz, 2H), 7.30 (d, *J* = 1.6 Hz, 1H), 7.02 (d, *J* = 8.4 Hz, 2H), 6.80 (d, *J* = 8.8 Hz, 2H), 3.90 (s, 3H), 3.88 (s, 3H), 3.78 (s, 3H); <sup>13</sup>C NMR (100 MHz, CDCl<sub>3</sub>) δ 189.6, 159.9, 159.8, 157.4, 155.4, 152.7, 131.4, 129.6, 128.1, 127.2, 126.4, 122.9, 115.3, 114.8, 114.1, 107.6, 103.2, 56.2, 55.4, 55.4; HRMS (ESI-QTOF) *m/z* [M+H]<sup>+</sup> calcd for C<sub>24</sub>H<sub>21</sub>O<sub>5</sub> 389.1384 found 389.1385.

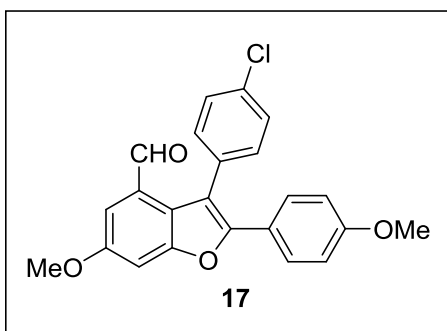

**3-(4-Chlorophenyl)-6-methoxy-2-(4-methoxyphenyl)benzofuran-4-carbaldehyde (17).** A

Similar as already described in [S1] a mixture of **13** (60 mg, 0.15 mmol), Pd(Ph<sub>3</sub>P)<sub>4</sub> (17 mg, 0.1 equiv), K<sub>2</sub>CO<sub>3</sub> (41 mg, 2.0 equiv), and 4-chlorophenylboronic acid (46 mg, 2.0 equiv) in toluene/EtOH/H<sub>2</sub>O (4:2:1, 1.75 mL) was heated at 100 °C for 3 h. The reaction mixture was concentrated under reduced pressure, diluted with CH<sub>2</sub>Cl<sub>2</sub> (5 mL), and washed with H<sub>2</sub>O (5 mL). The water layer was extracted with CH<sub>2</sub>Cl<sub>2</sub> (5 mL × 2) two more times. The combined organic layers were dried over MgSO<sub>4</sub> and concentrated in vacuo. The residue was purified by silica gel column chromatography (hexanes/ethyl acetate/dichloromethane = 20:1:2) to give **17**. Yellow solid, mp: 128.9-129.4 °C (45 mg, 78%); <sup>1</sup>H NMR (400 MHz, CDCl<sub>3</sub>) δ 9.76 (s, 1H), 7.49 (d, *J* = 8.4 Hz, 2H), 7.47-7.37 (m, 5H), 7.34 (d, *J* = 2.0 Hz, 1H), 6.83 (d, *J* = 8.8 Hz, 2H), 3.92 (s, 3H), 3.81 (s, 3H); <sup>13</sup>C NMR (100 MHz, CDCl<sub>3</sub>) δ 189.1, 160.1, 157.6, 155.5, 152.9, 134.8, 133.2, 131.8, 130.2, 129.5, 128.2, 126.3, 122.5, 114.2, 114.0, 108.3, 103.3, 56.2, 55.4; HRMS (ESI-QTOF) *m/z* [M+H]<sup>+</sup> calcd for C<sub>23</sub>H<sub>18</sub>ClO<sub>4</sub> 393.0888 found 393.0889.

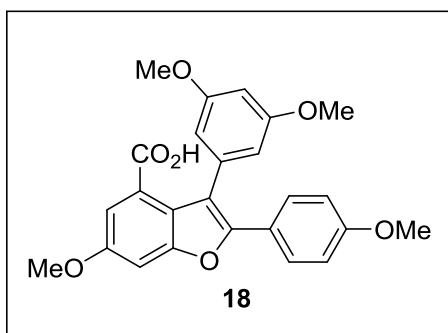

**3-(3,5-Dimethoxyphenyl)-6-methoxy-2-(4-methoxyphenyl)benzofuran-4-carboxylic acid (18)**. To a stirred solution of **14** (30 mg, 0.07 mmol) in THF (1.5 mL) were added NaClO<sub>2</sub> (65 mg, 10.0 equiv), NaH<sub>2</sub>PO<sub>4</sub> (99 mg, 10.0 equiv) in H<sub>2</sub>O (0.6 mL), and 2-methyl-2-butene (0.3 mL) at rt. After being stirred at 40 °C for 1 h, the reaction mixture was concentrated under reduced pressure and diluted with CH<sub>2</sub>Cl<sub>2</sub> (3 mL) and H<sub>2</sub>O (3 mL). The water layer was extracted with CH<sub>2</sub>Cl<sub>2</sub> (3 mL × 2) more two times. The combined organic layers were dried over MgSO<sub>4</sub> and concentrated in vacuo to give **18**. White solid, mp: decomposed at 112 °C

(31 mg, 100%); **<sup>1</sup>H NMR** (400 MHz, DMSO-d<sub>6</sub>) δ 7.45 (d, *J* = 2.0 Hz, 1H), 7.42 (d, *J* = 8.8 Hz, 2H), 7.09 (d, *J* = 1.6 Hz, 1H), 6.93 (d, *J* = 8.8 Hz, 2H), 6.50 (s, 1H), 6.43 (d, *J* = 1.6 Hz, 2H), 3.86 (s, 3H), 3.75 (s, 3H), 3.70 (s, 6H); **<sup>13</sup>C NMR** (100 MHz, DMSO-d<sub>6</sub>) δ 167.4, 160.3, 159.4, 156.8, 154.7, 150.5, 135.4, 127.8, 127.1, 122.3, 120.3, 115.9, 114.1, 112.0, 107.8, 99.6, 98.6, 56.0, 55.2, 55.1; **HRMS** (ESI-QTOF) *m/z* [M+H]<sup>+</sup> calcd for C<sub>25</sub>H<sub>23</sub>O<sub>7</sub> 435.1438 found 435.1439.

## Reference

S1 Jung, Y.; Kim, I. *Asian J. Org. Chem.* **2016**, *5*, 147. doi:10.1002/ajoc.201500423

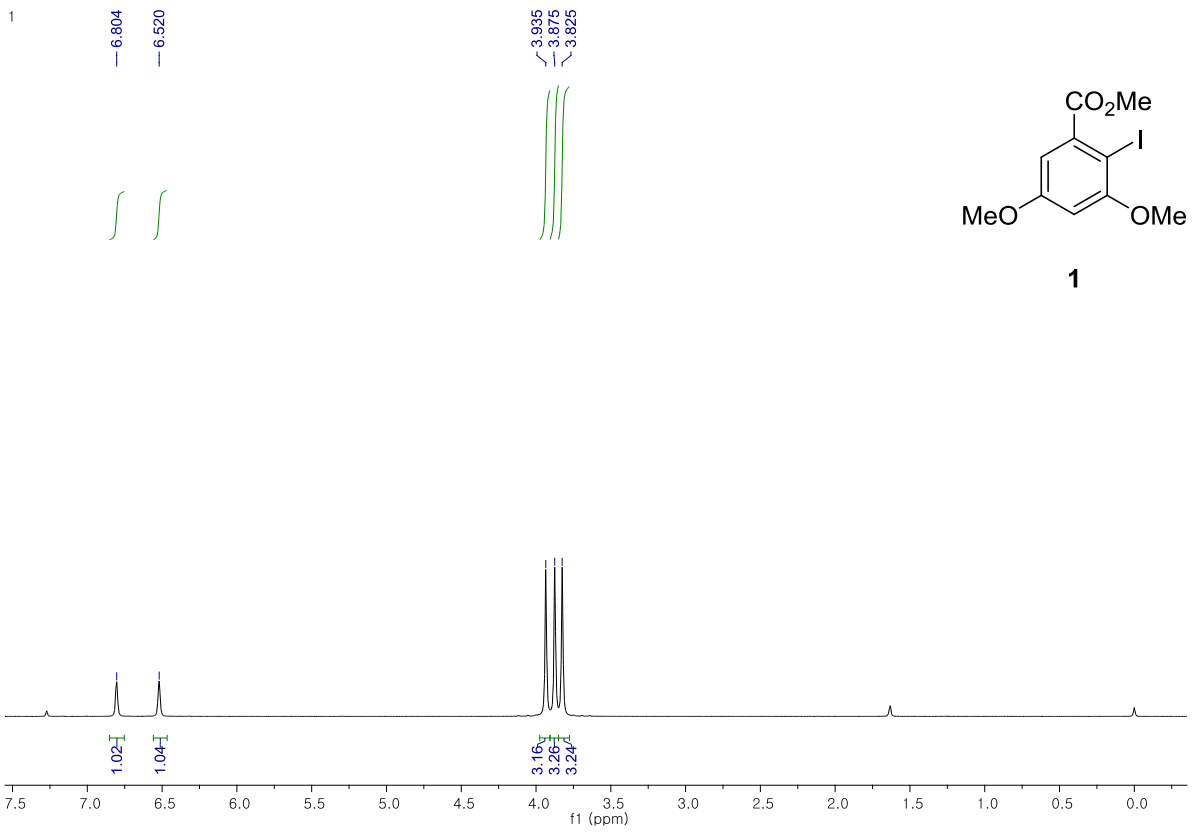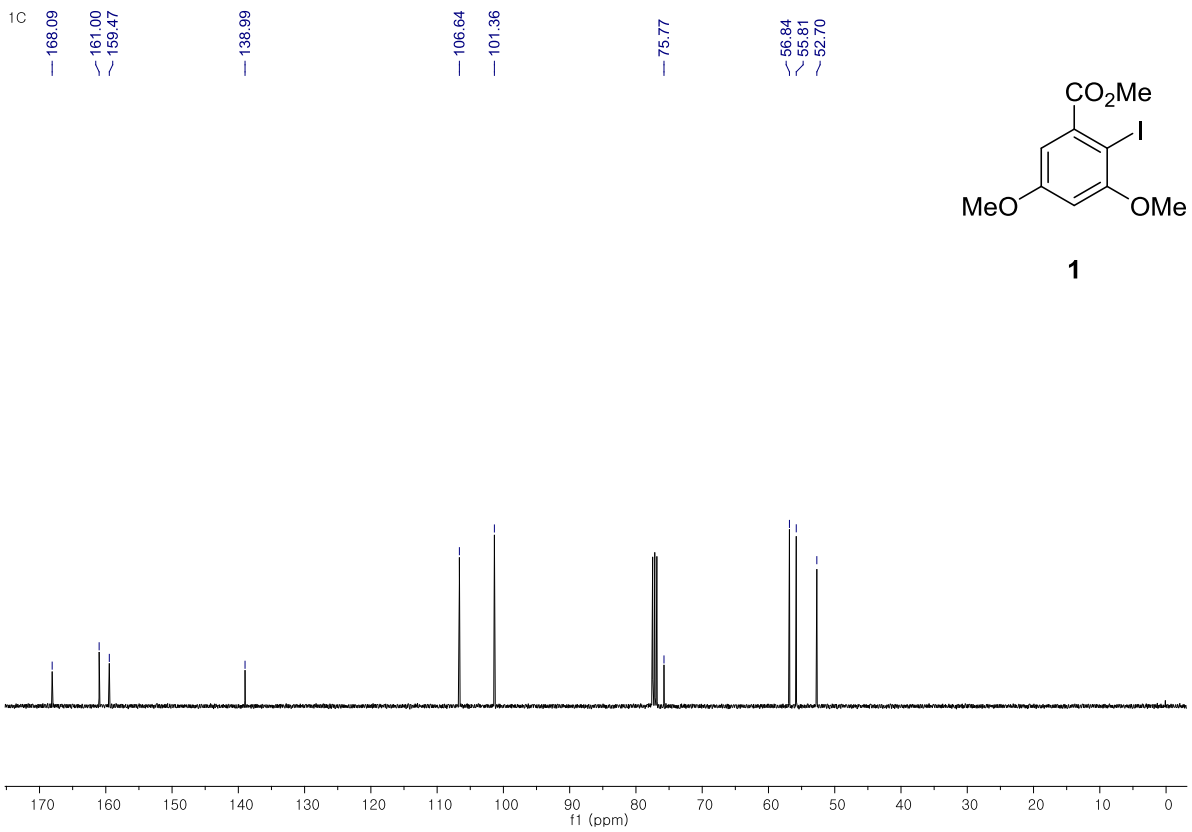

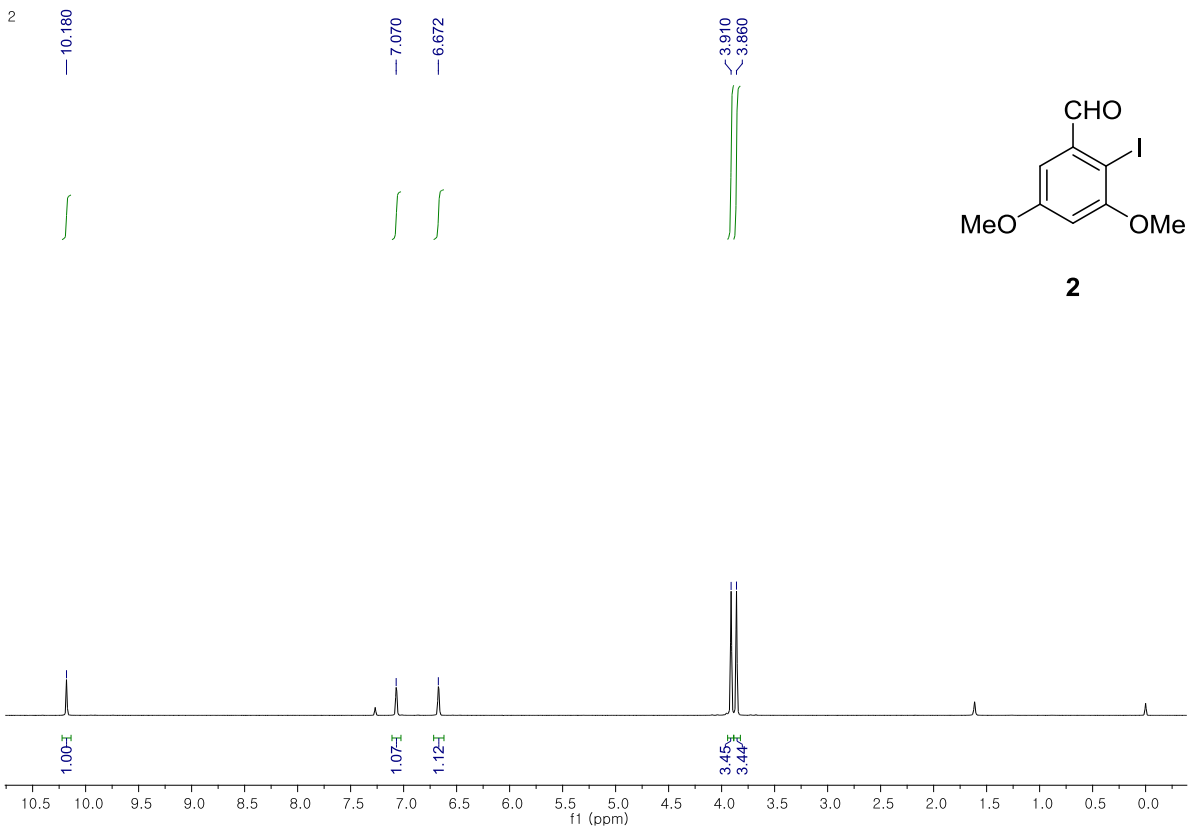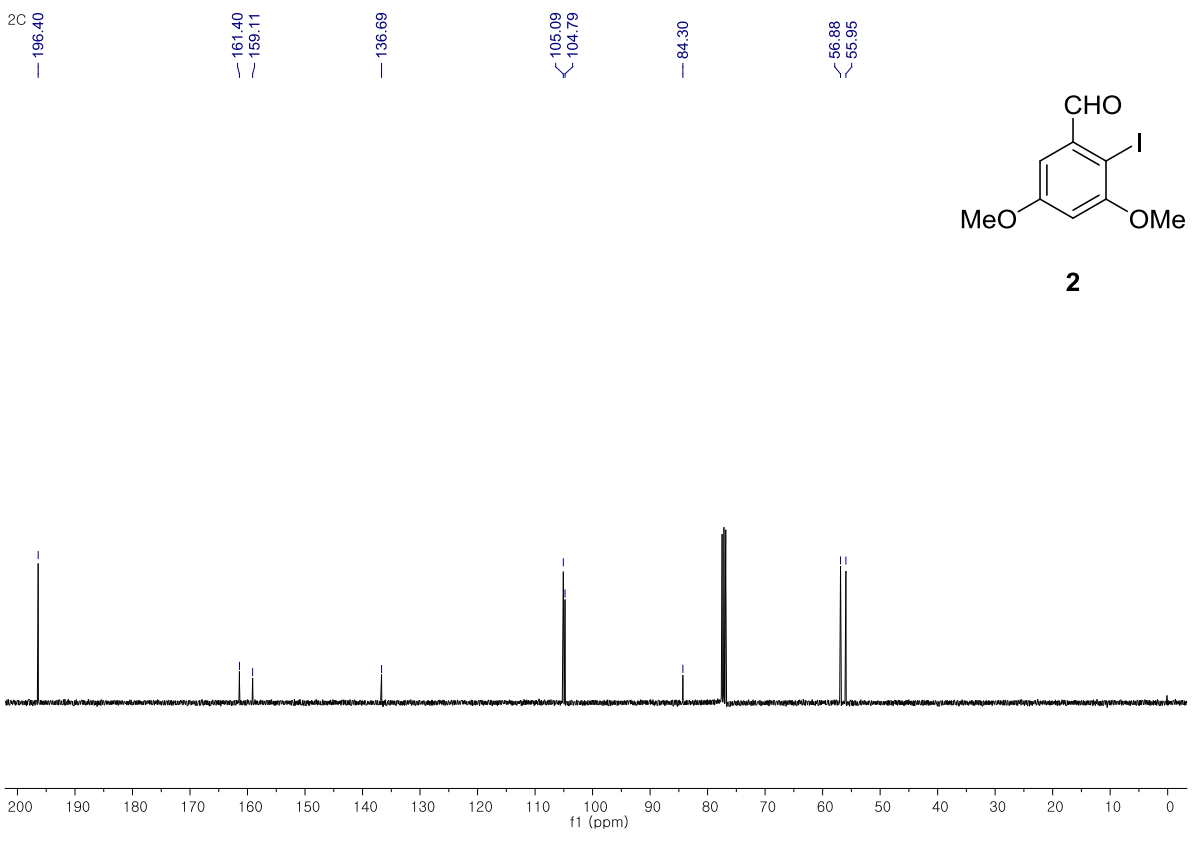



3

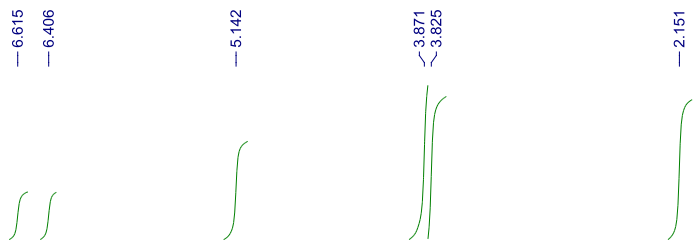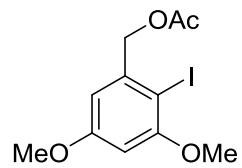

3

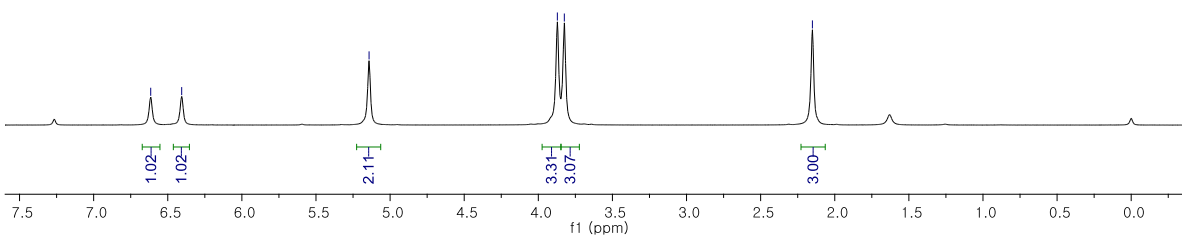

3C

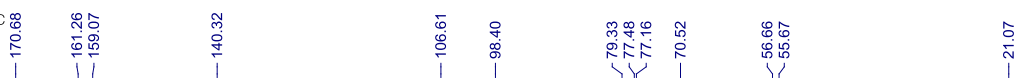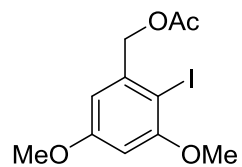

3

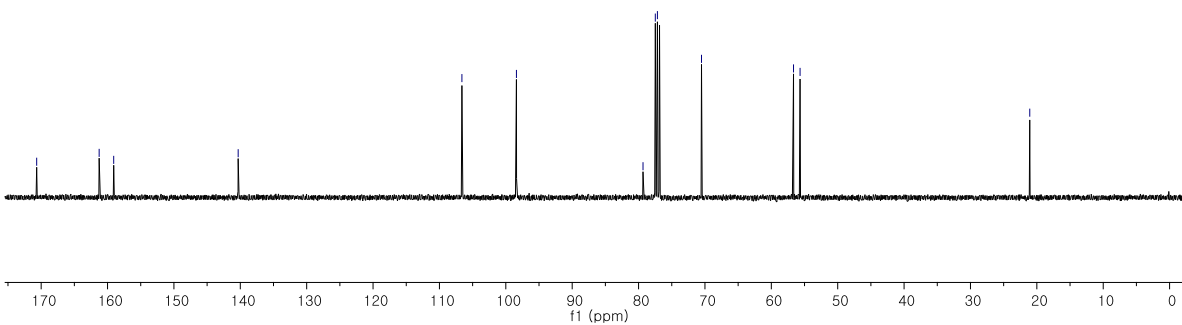

4

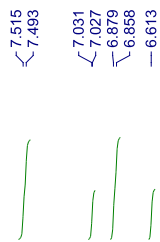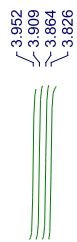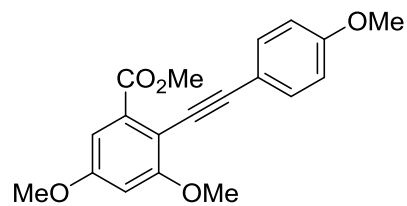

4

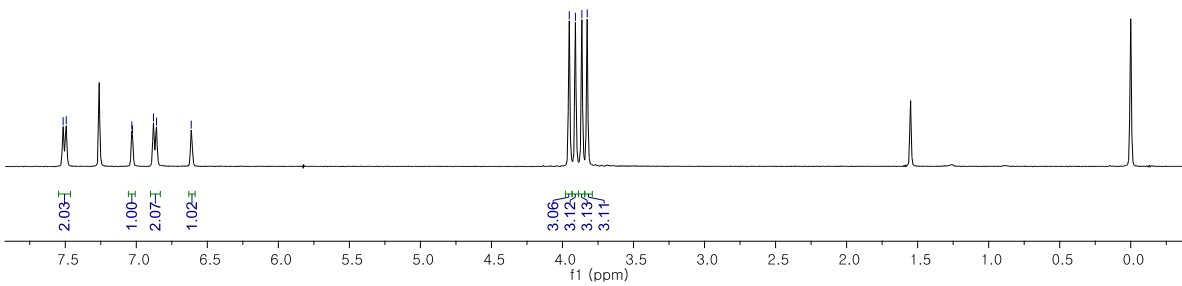

4C

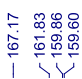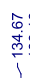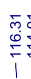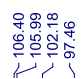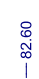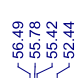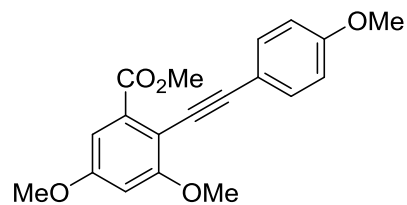

4

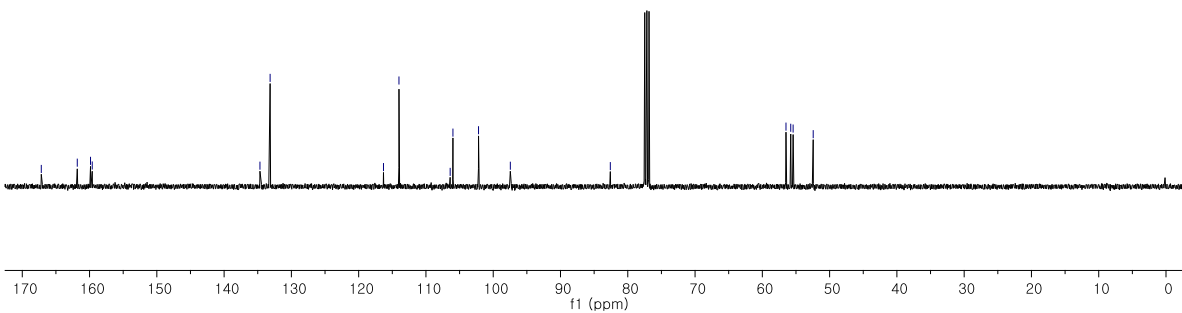

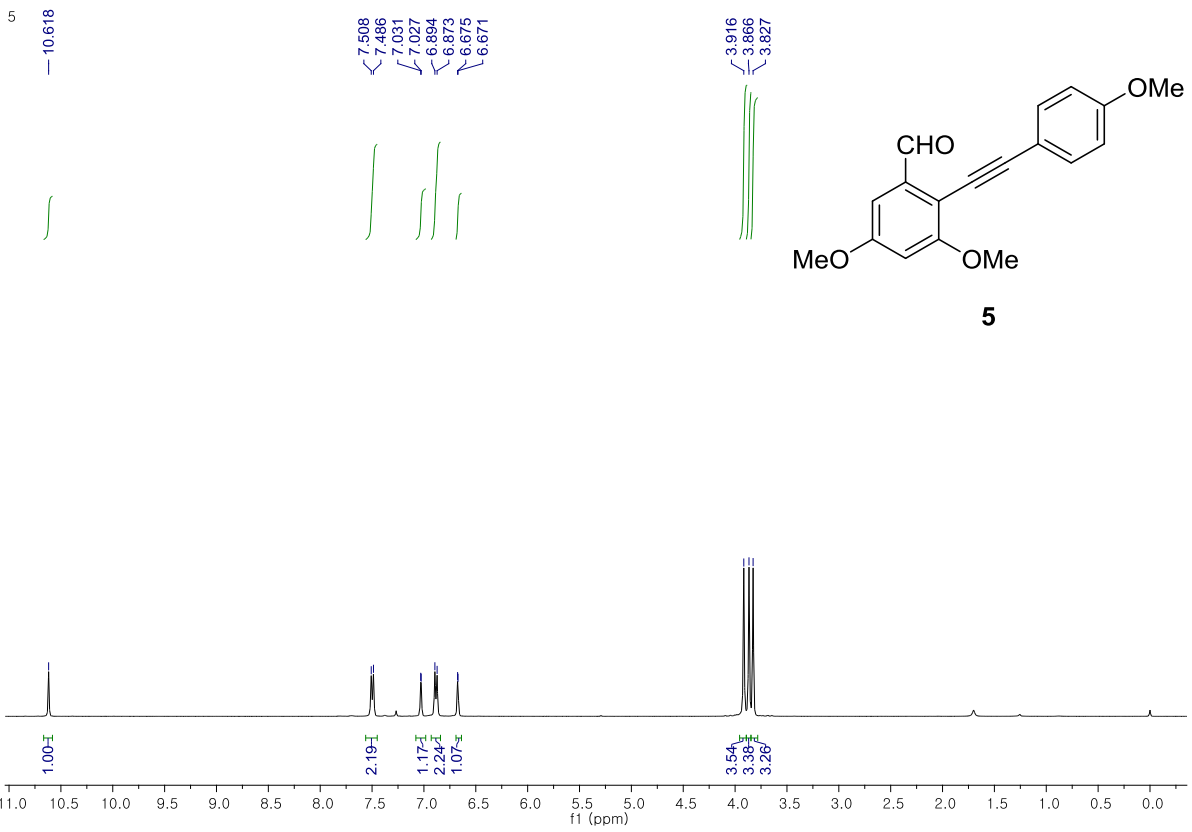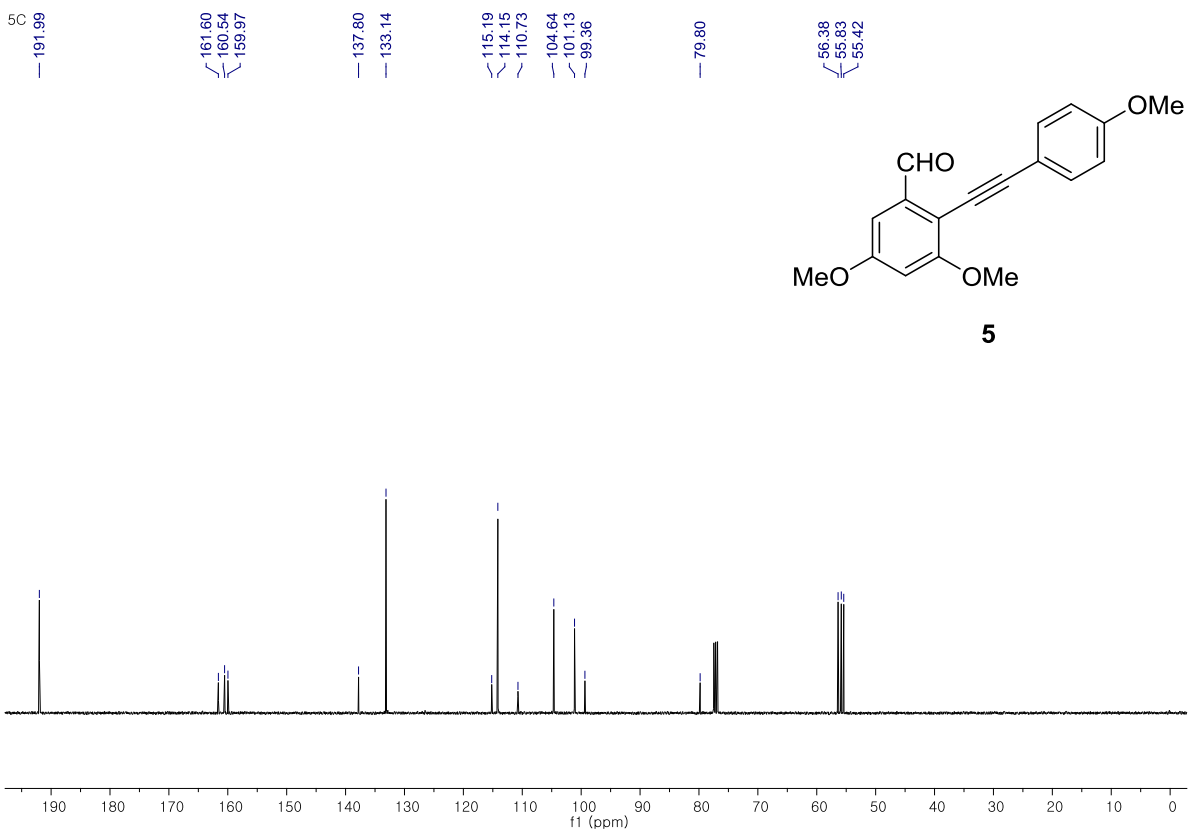

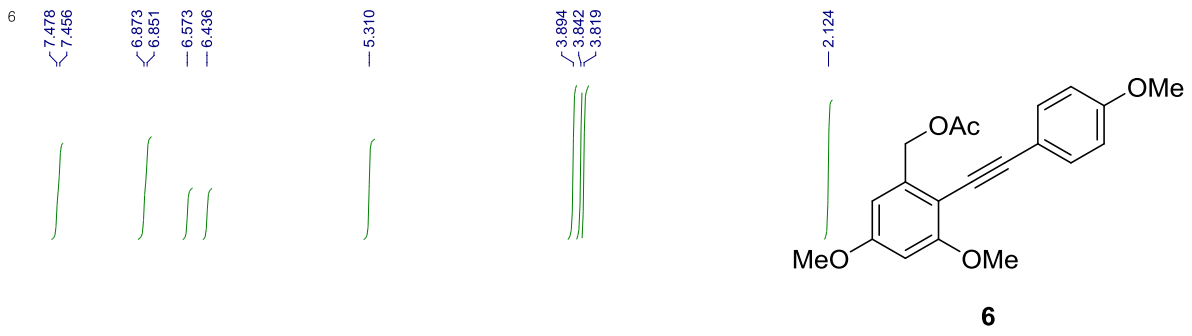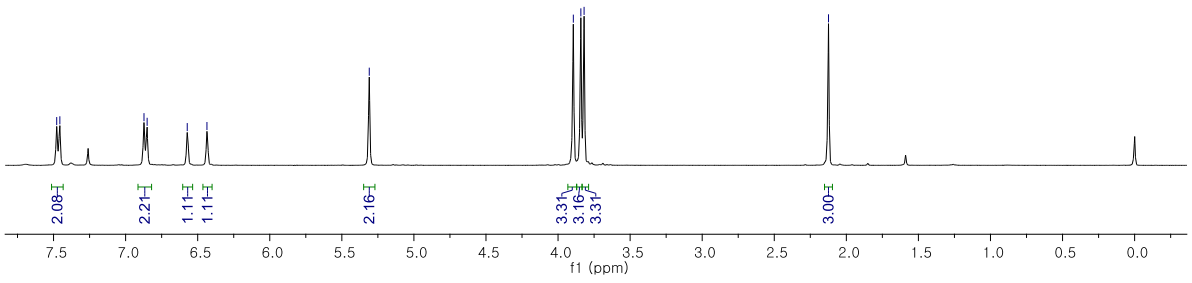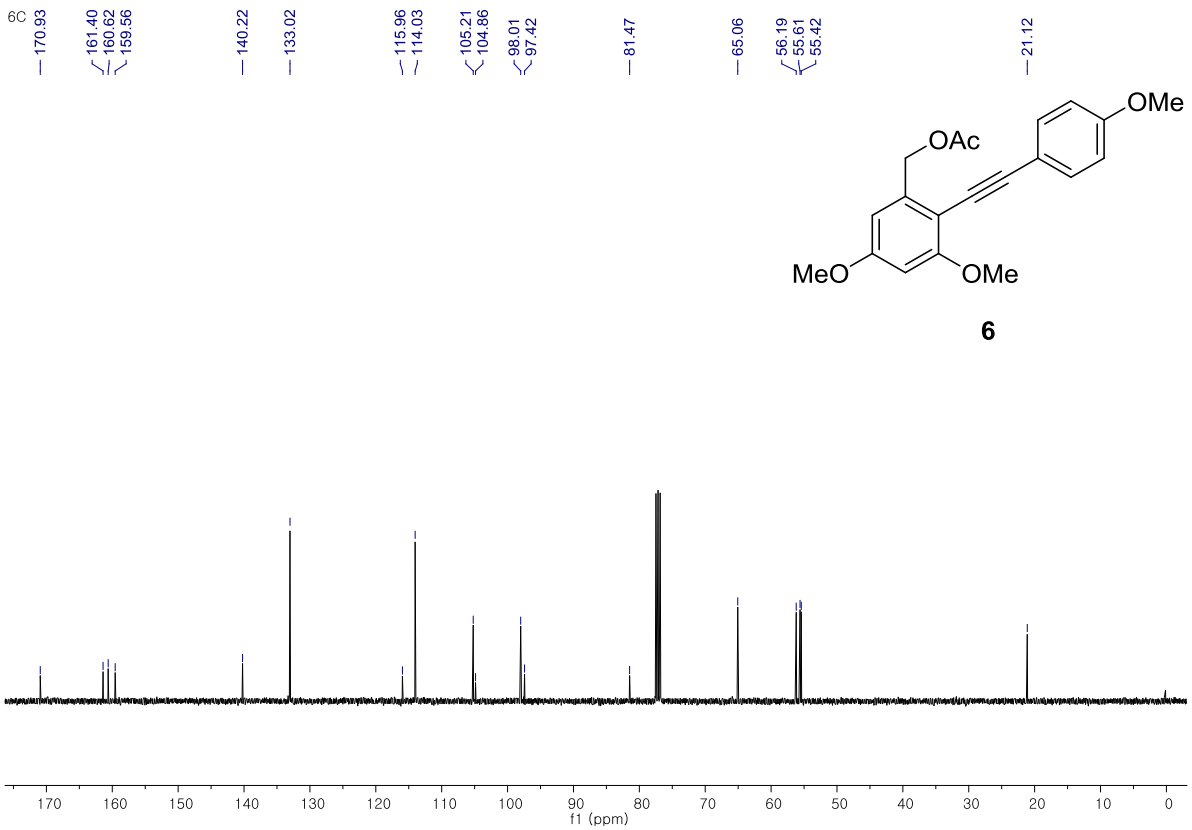

7

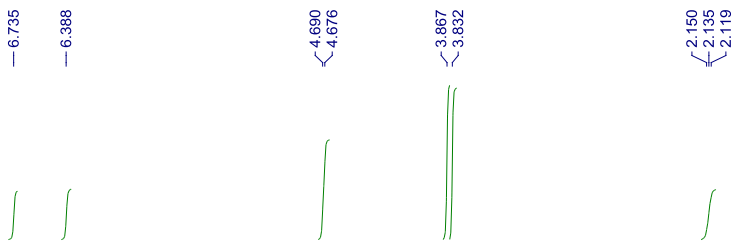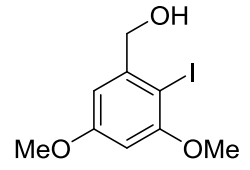

7

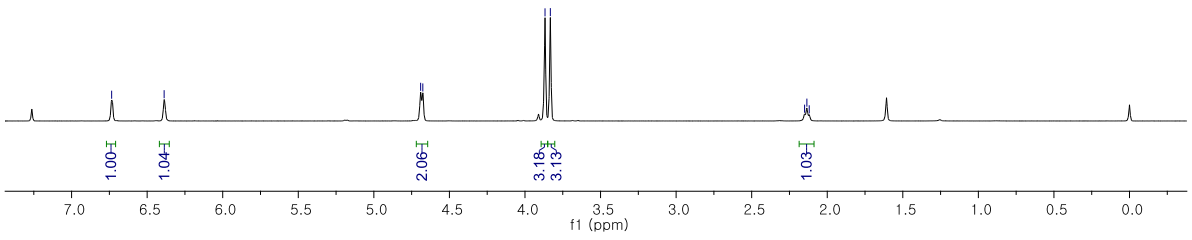

7C

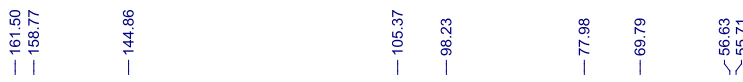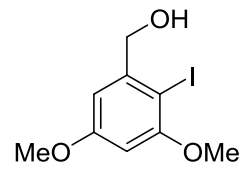

7

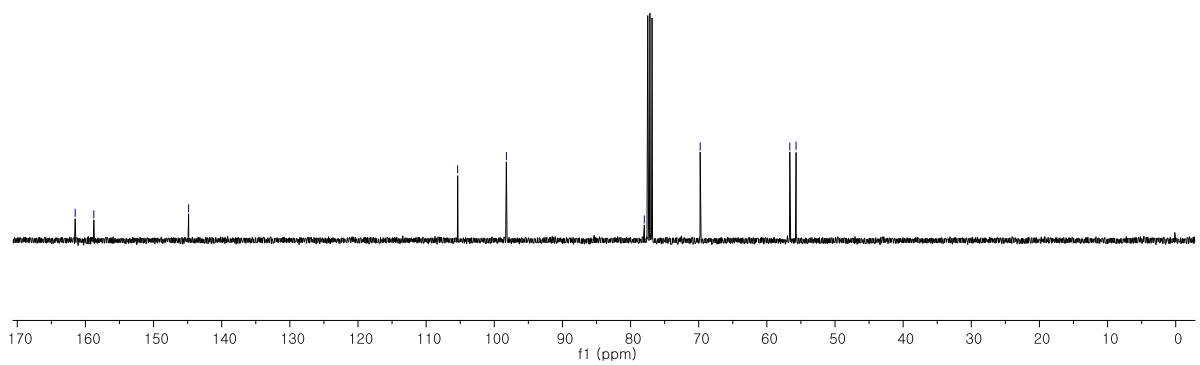

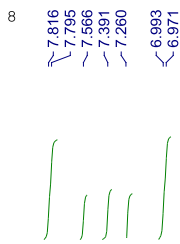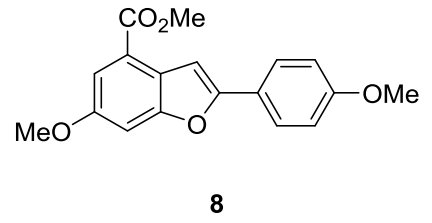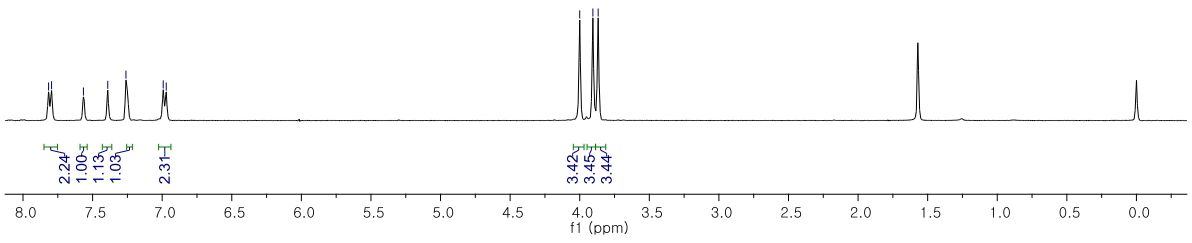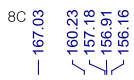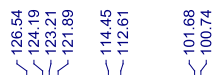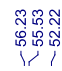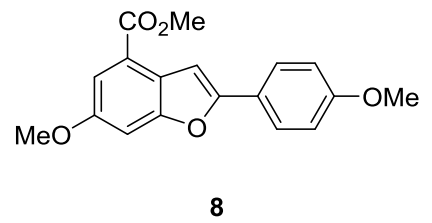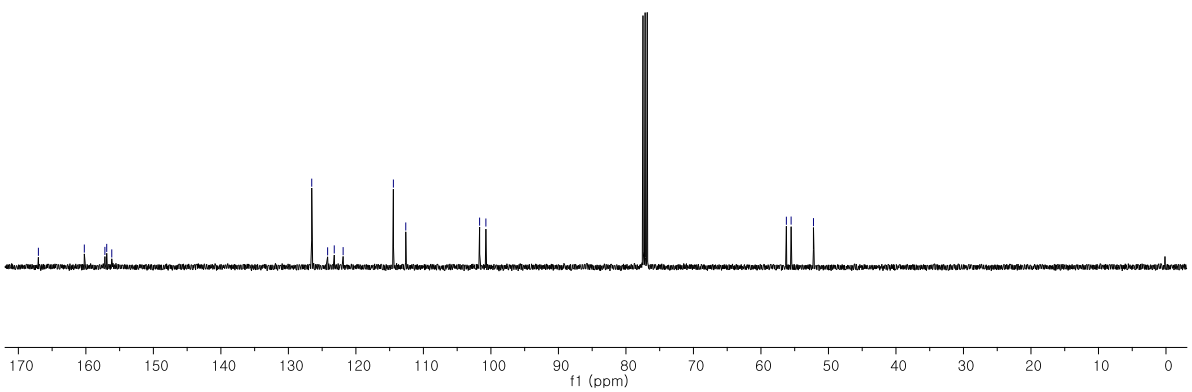

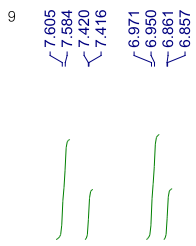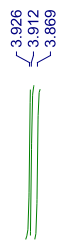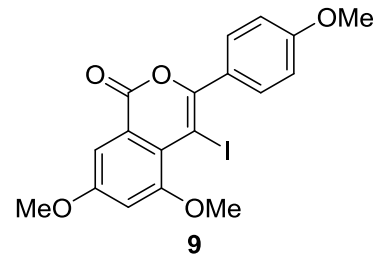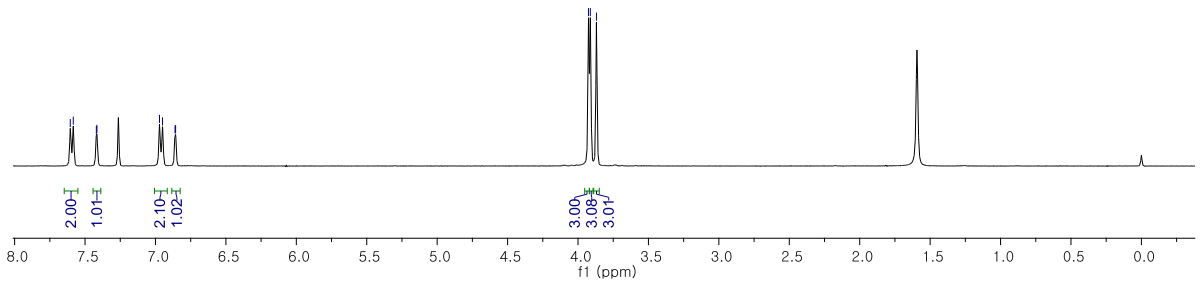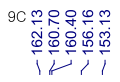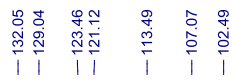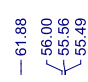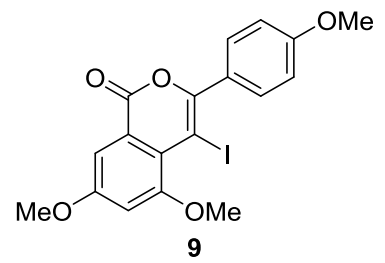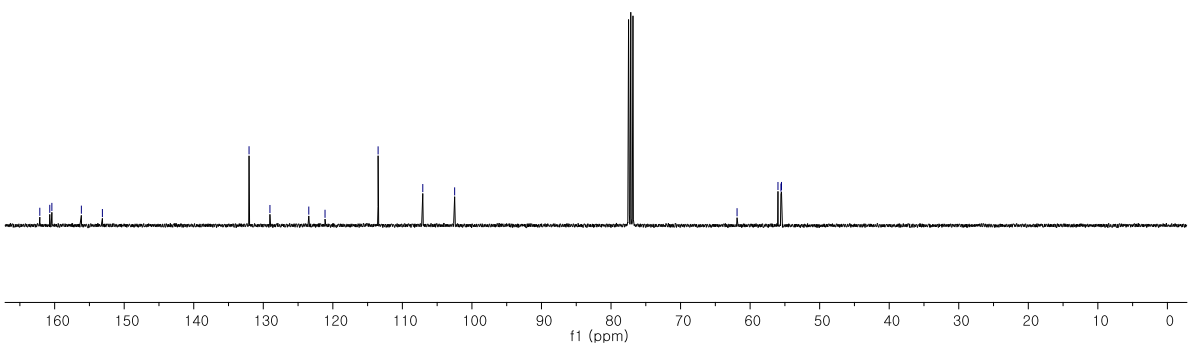

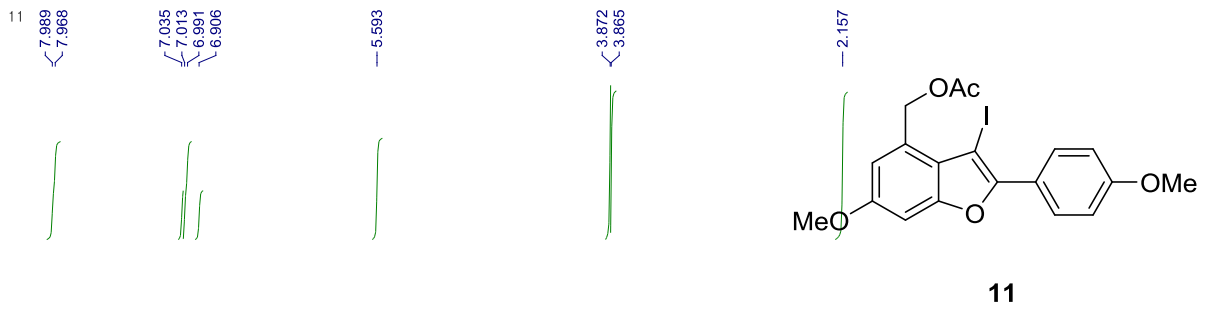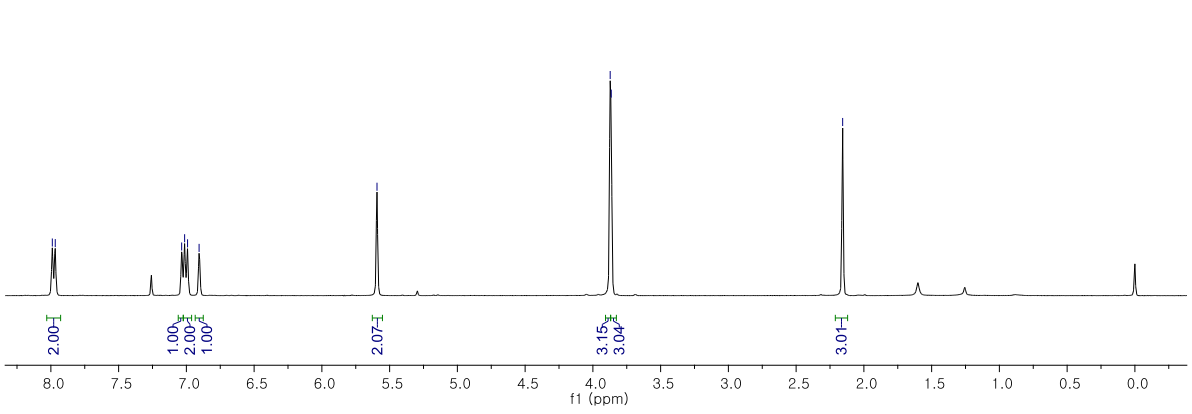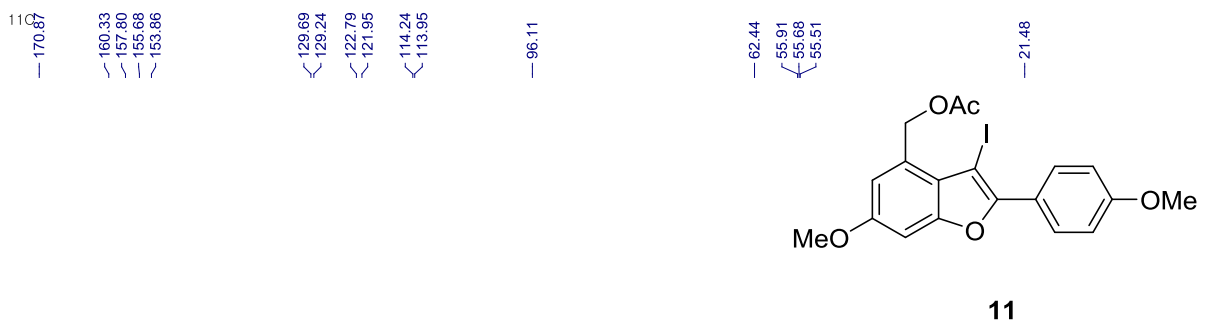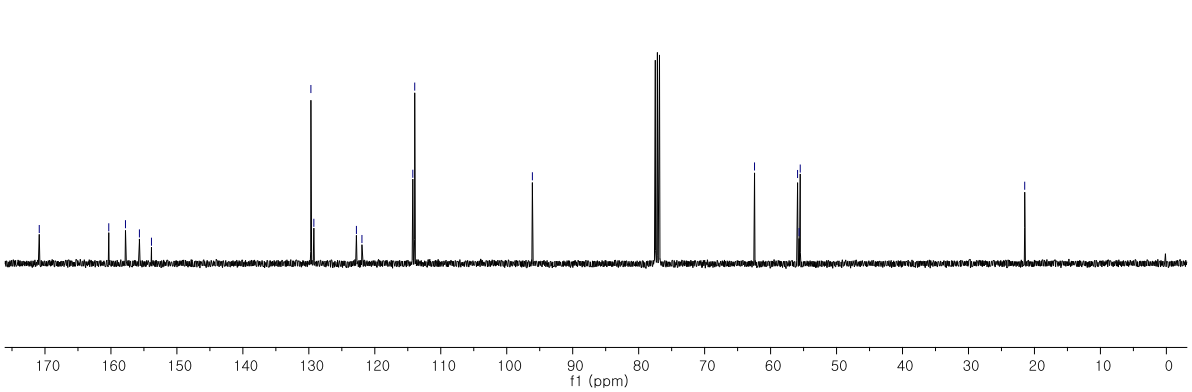



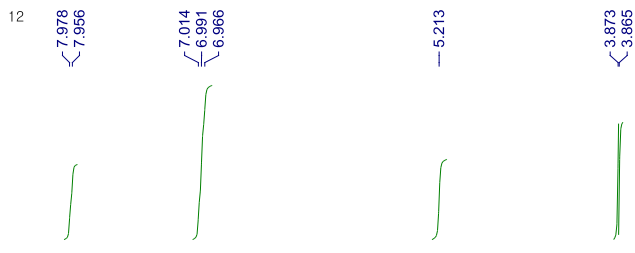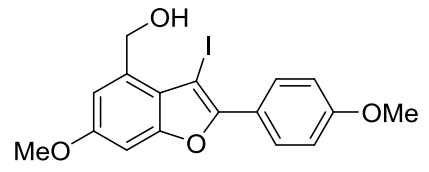

12

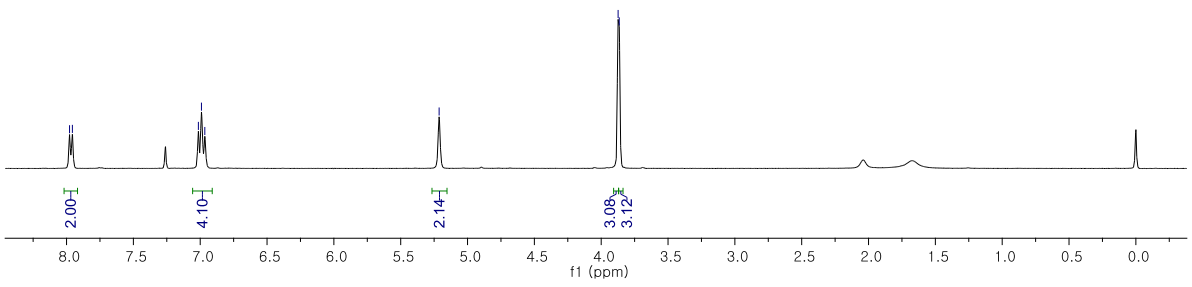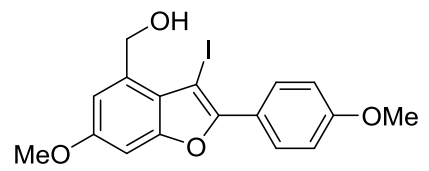

12

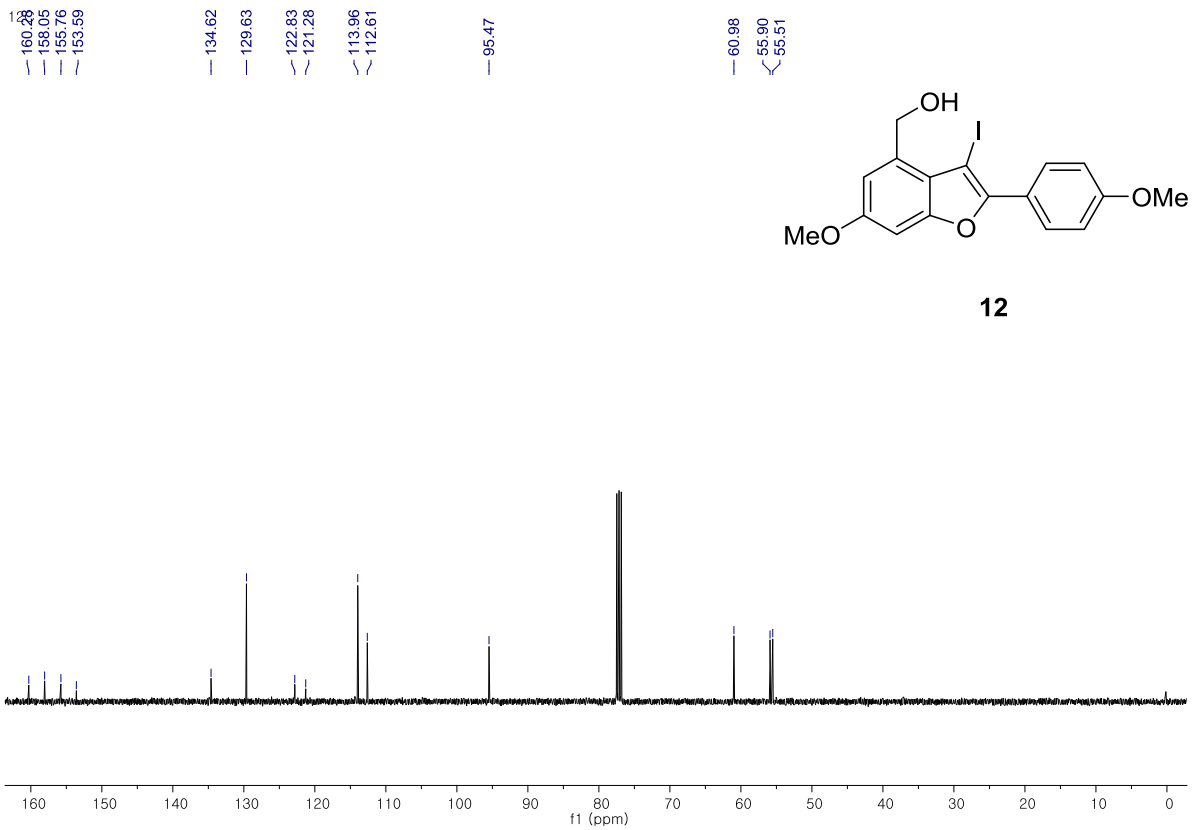

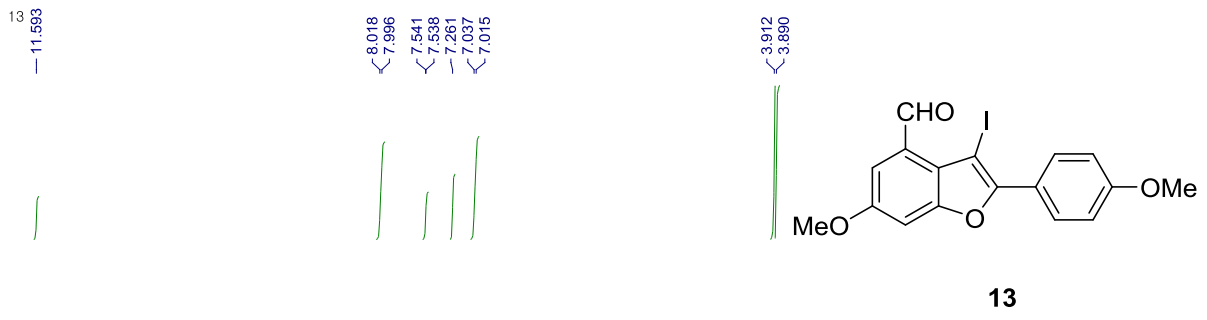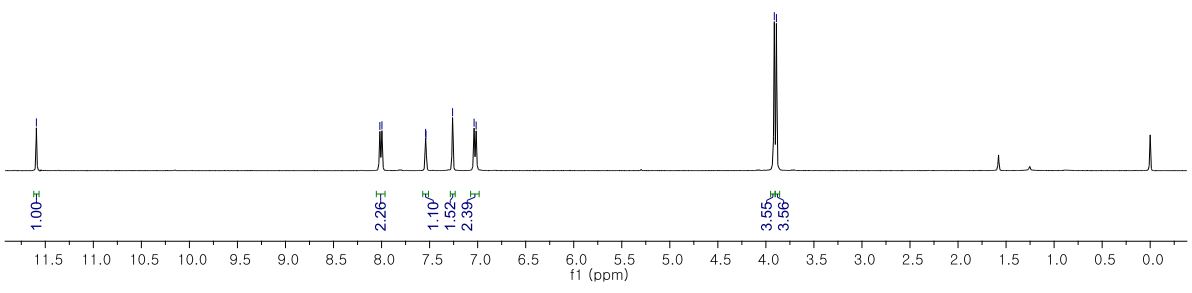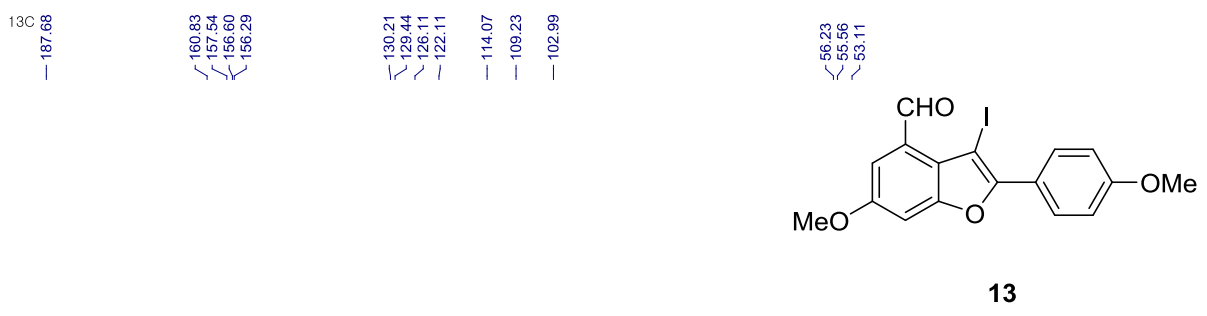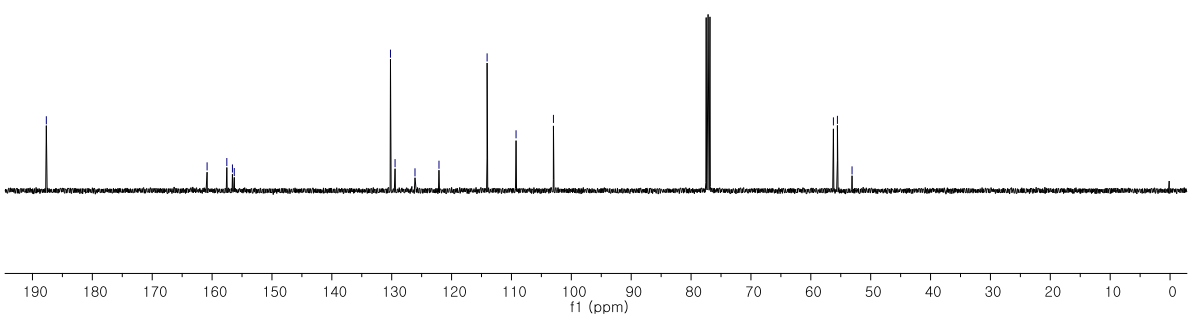

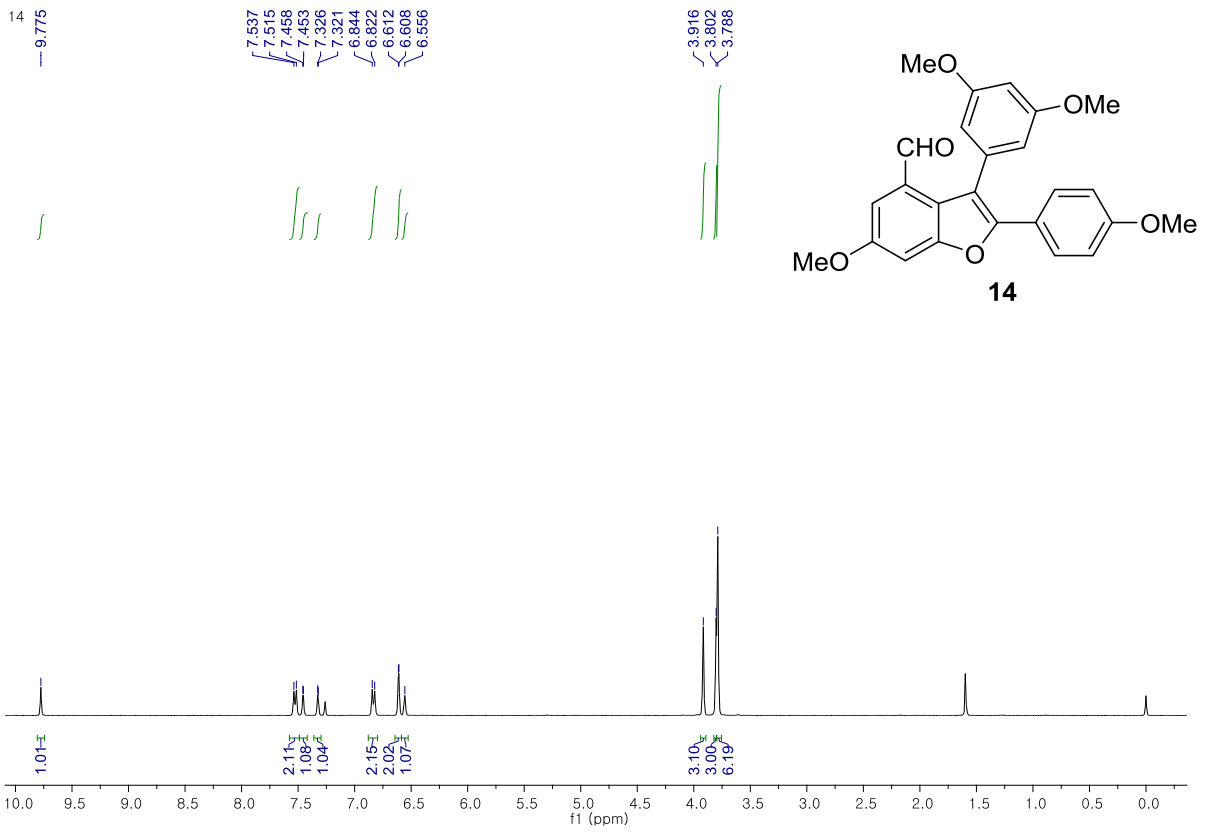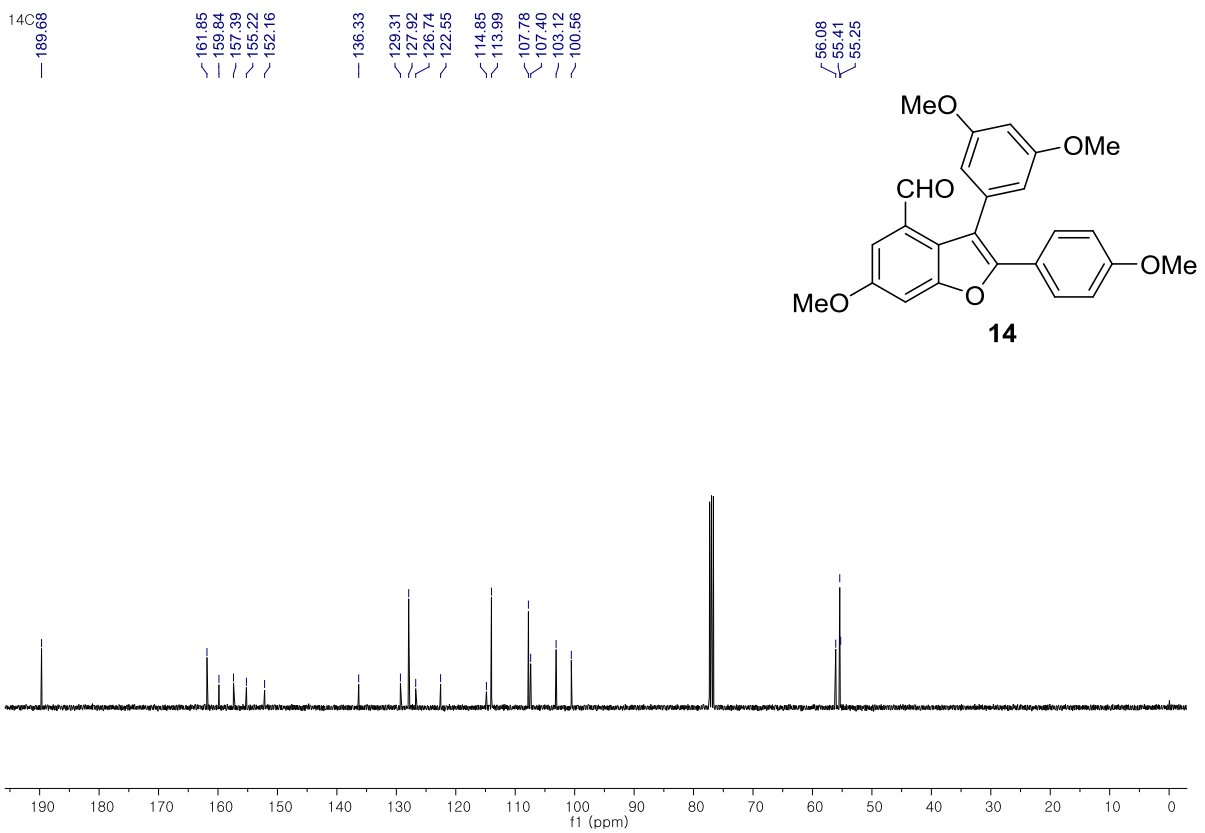

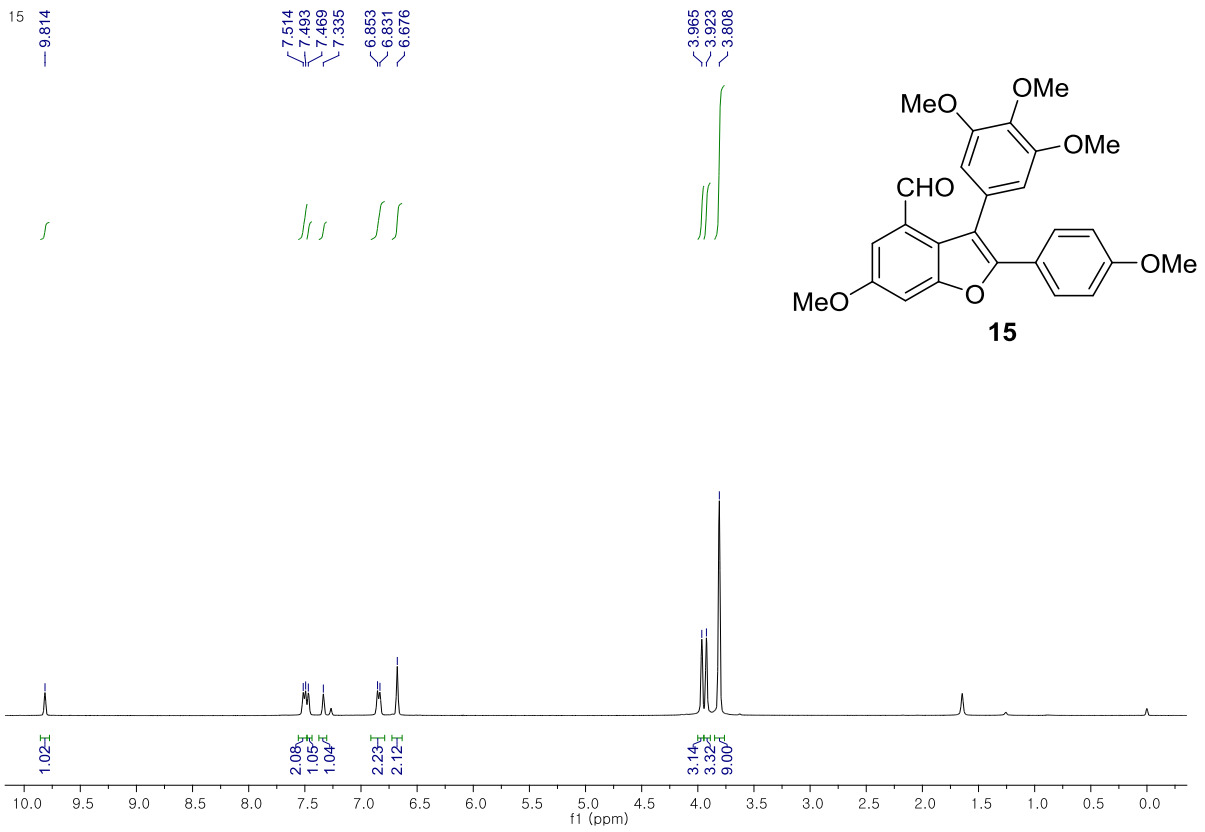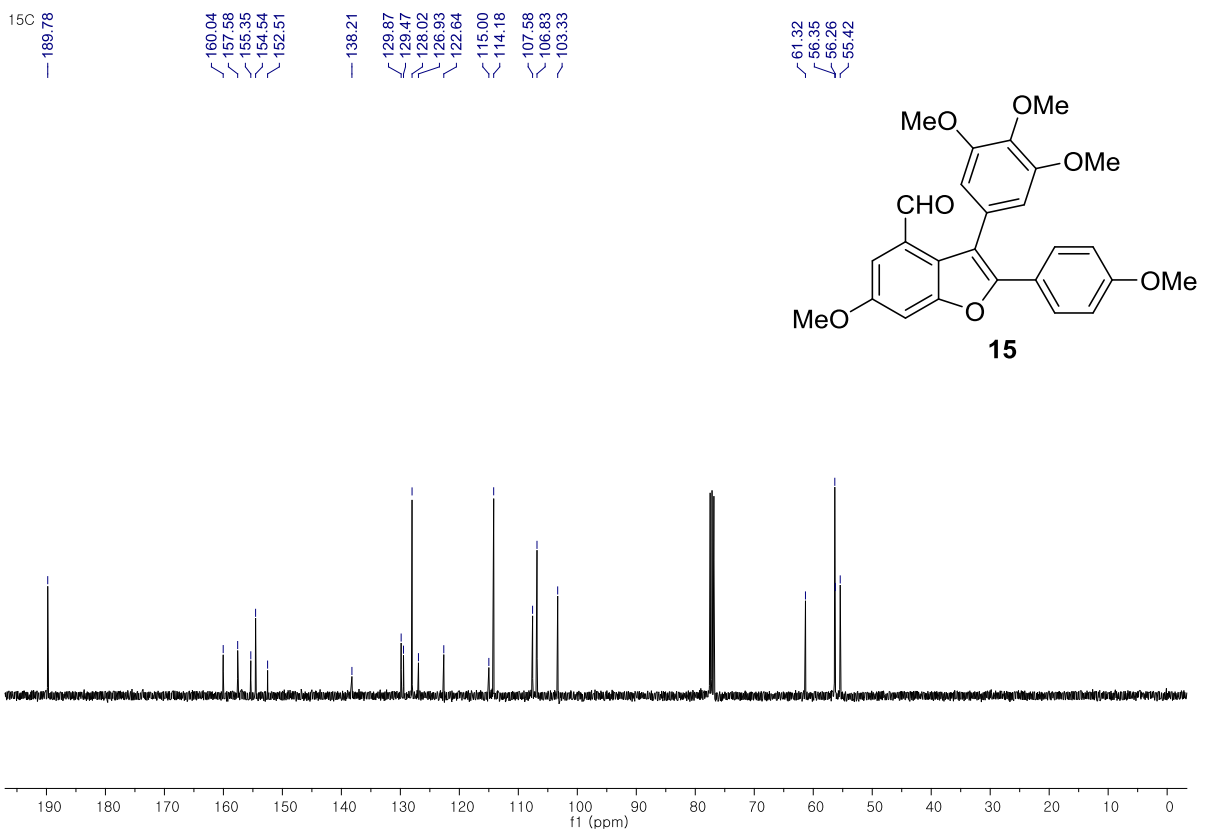

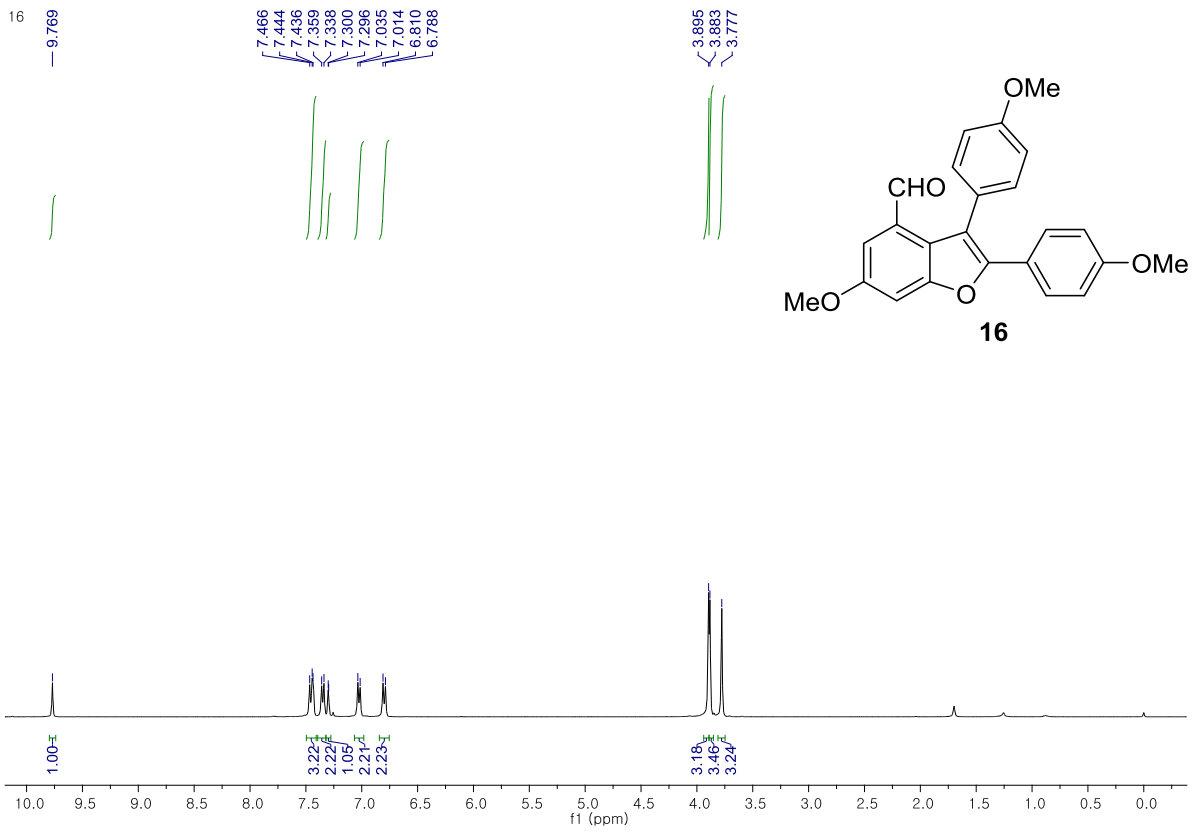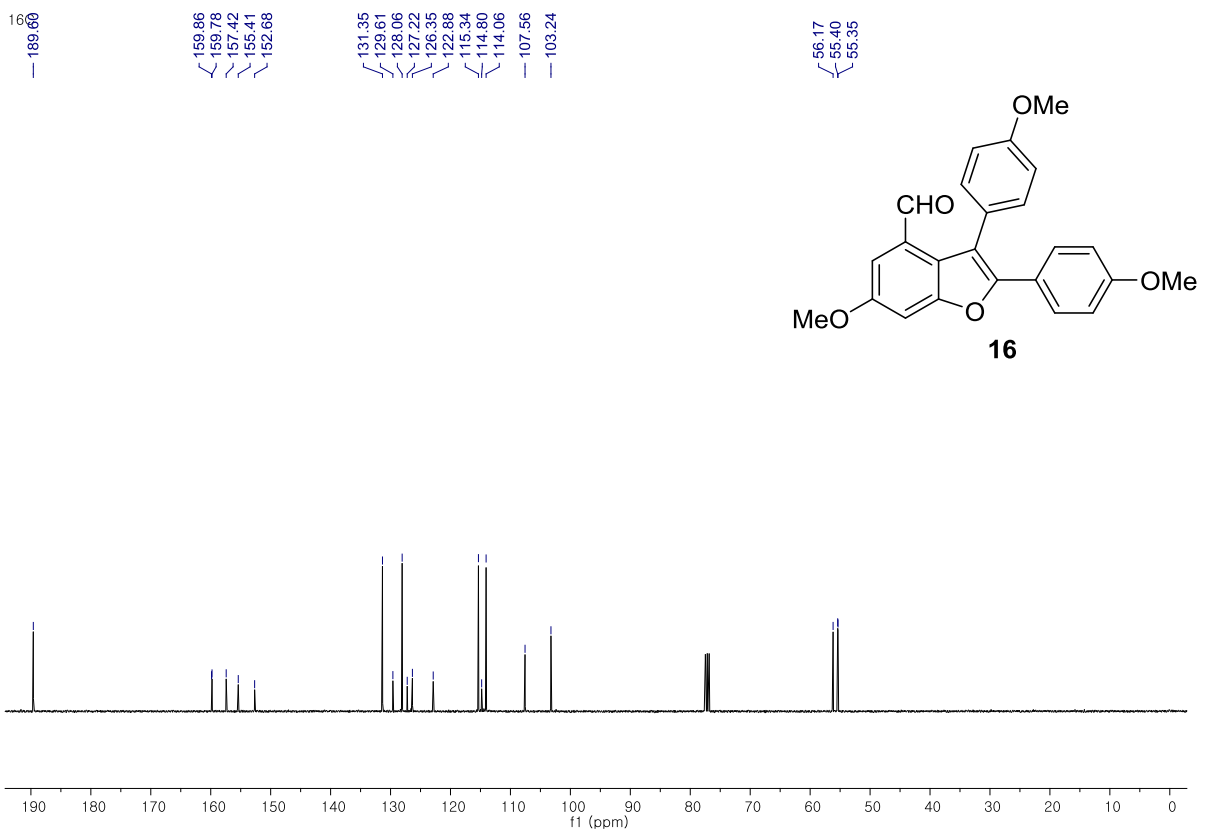

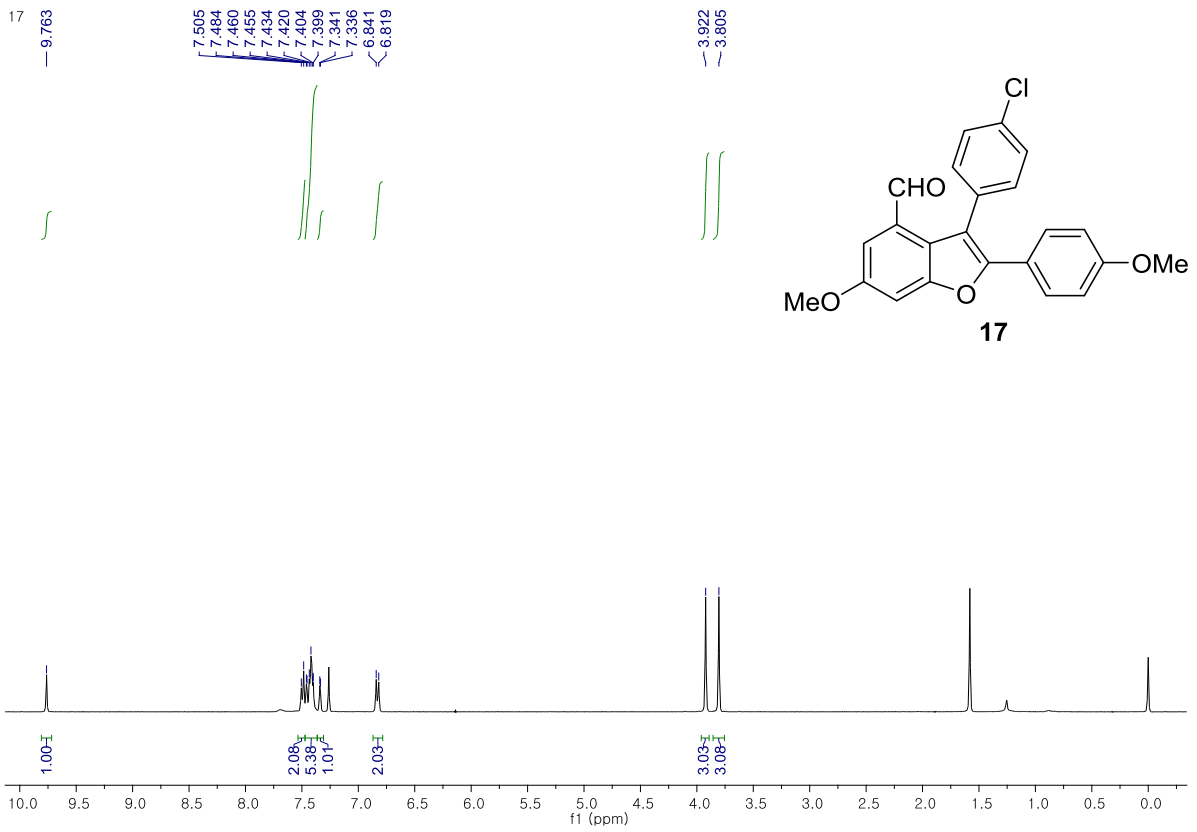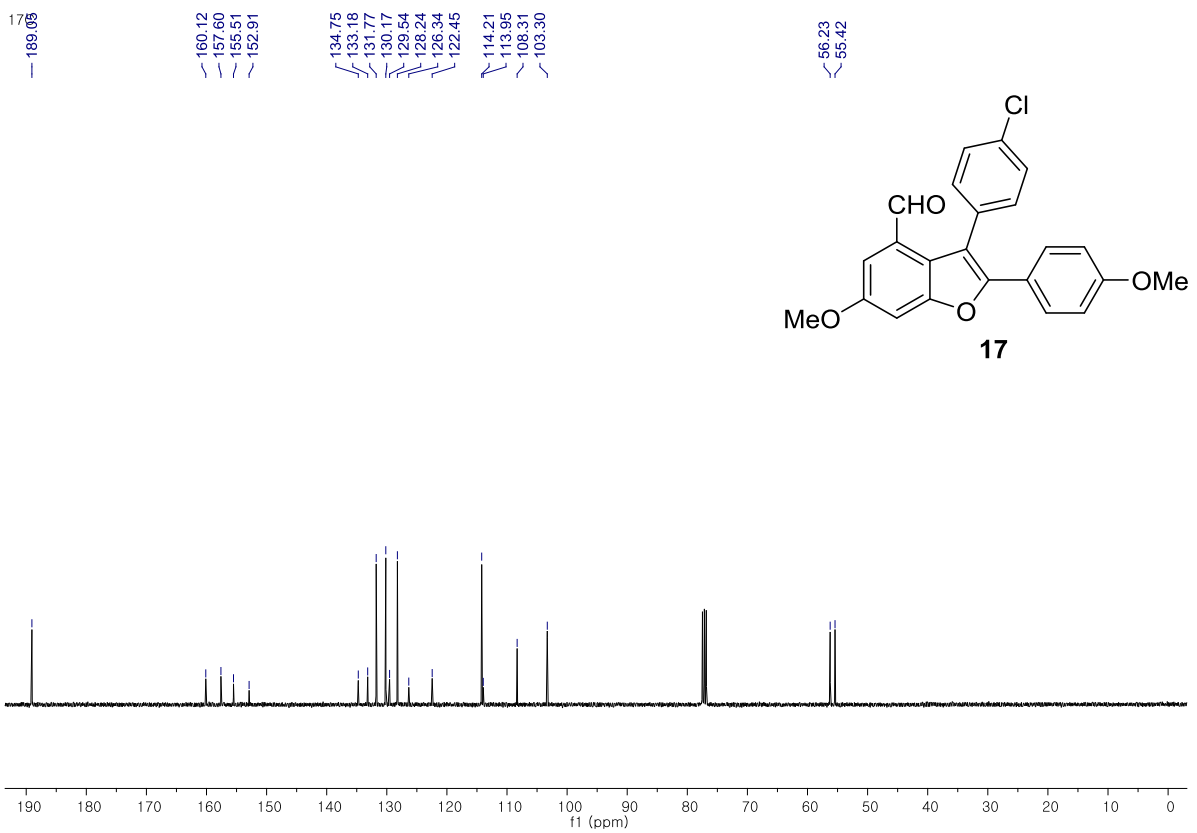

18  
 7.450  
 7.445  
 7.435  
 7.413  
 7.088  
 7.084  
 6.943  
 6.921  
 6.500  
 6.432  
 6.428

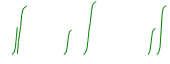

3.862  
 3.765  
 3.704

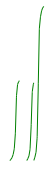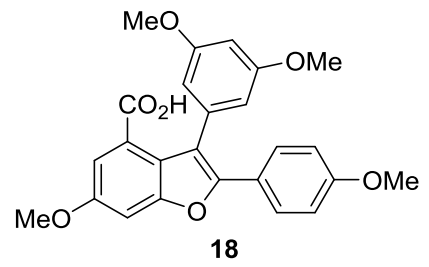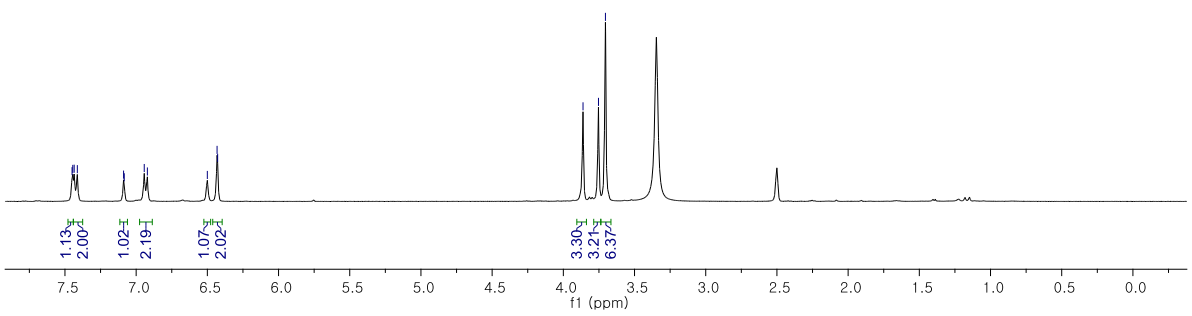

167.44  
 160.31  
 159.41  
 156.84  
 154.66  
 150.52  
 135.41  
 127.84  
 127.11  
 122.31  
 120.32  
 115.94  
 114.13  
 111.98  
 107.82  
 99.64  
 98.55

55.97  
 55.23  
 55.13

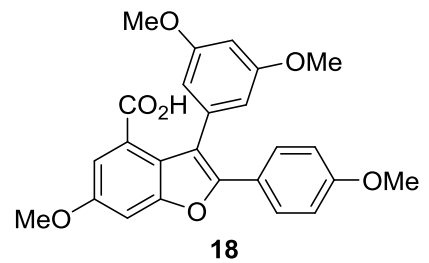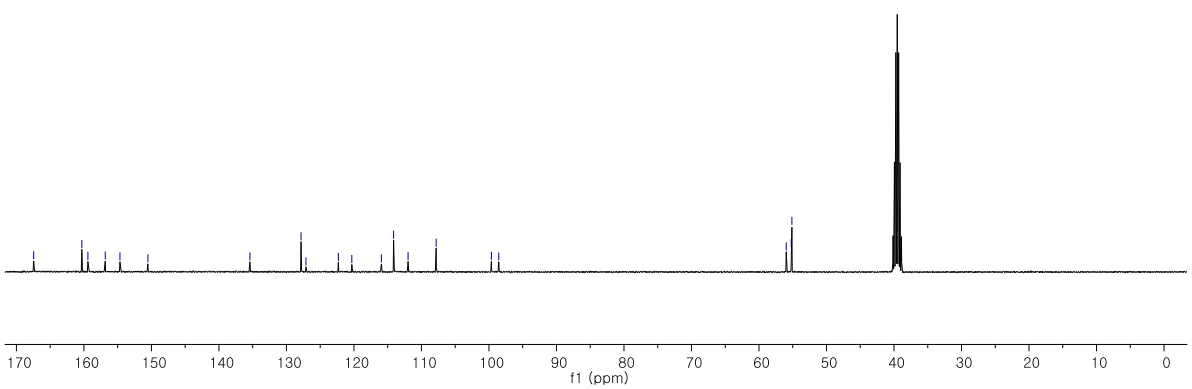

Supplement: Additional file 1 [file 1860-5397-12-266-S1.pdf]
